# Supplementary material for: In vitro Characterization of Phenylacetate Decarboxylase, a Novel Enzyme Catalyzing Toluene Biosynthesis in an Anaerobic Microbial Community
Source: PubMed Central journal article supplement (PMC4979209; doi:10.1038/srep31362), 2016-08-10
Supplement: srep31362-s1.pdf [file srep31362-s1.pdf]

## SUPPLEMENTARY INFORMATION

### *In vitro* Characterization of Phenylacetate Decarboxylase, a Novel Enzyme Catalyzing Toluene Biosynthesis in an Anaerobic Microbial Community

K. Zargar<sup>1</sup>, R. Saville<sup>1</sup>, R. Phelan<sup>1,2</sup>, S. G. Tringe<sup>3</sup>, C. J. Petzold<sup>1,4</sup>, J. D. Keasling<sup>1, 4,5,6</sup>,  
H. R. Beller\*<sup>1,7</sup>

Joint BioEnergy Institute (JBEI), 5885 Hollis Avenue, Emeryville, CA, USA<sup>1</sup>; QB3 Institute, University of California, Berkeley, California 94270, United States<sup>2</sup>; Joint Genome Institute, 2800 Mitchell Drive, Walnut Creek, CA, USA<sup>3</sup>; Biological Systems and Engineering, Lawrence Berkeley National Laboratory (LBNL), Berkeley, CA, USA<sup>4</sup>; Departments of Chemical & Biomolecular Engineering and of Bioengineering, University of California, Berkeley, CA, USA<sup>5</sup>; Novo Nordisk Foundation Center for Biosustainability, Technical University of Denmark, Kogle Allé, DK2970-Hørsholm, Denmark<sup>6</sup>; Earth and Environmental Sciences, LBNL, Berkeley, CA, USA<sup>7</sup>

# SUPPLEMENTARY INFORMATION

## TEXT S1. AUXILIARY MATERIALS AND METHODS

### Aromatic chemicals

Aromatic compounds included the following: toluene (Sigma-Aldrich, St. Louis, MO;  $\geq 99.9\%$ ), phenylacetic acid (Aldrich; 99%), phenylacetic acid-2- $^{13}\text{C}$  (Icon Isotopes, Summit, NJ; 99 atom%  $^{13}\text{C}$ ), L-phenylalanine- $\beta$ - $^{13}\text{C}$  (Aldrich; 99 atom%  $^{13}\text{C}$ ), *p*-hydroxyphenylacetic acid (Aldrich, 98%), *p*-cresol (Fluka, St. Louis, MO;  $\geq 99.7\%$ ), 2-phenylpropionate (Aldrich; 97%), 3-phenylpropionate (Sigma-Aldrich; 99%), phenylacetaldehyde (Alfa Aesar, Ward Hill, MA; 95%), 2-phenylacetamide (Oakwood Chemical, Estill, SC; 99%), 2-(4-hydroxyphenyl)acetamide (Aldrich; 99%), phenaceturic acid (TCI America, Portland, OR;  $>98\%$ ), atenolol (Sigma;  $\geq 98\%$ ), ethylbenzene (Fluka;  $\geq 99.5\%$ ), and 4-ethyltoluene (Fluka;  $\geq 95\%$ ).

### Growth medium for sewage-derived enrichment culture

The growth medium (pH 7.1) for the enrichment culture included the following compounds (grams per liter):  $\text{KH}_2\text{PO}_4$  (0.25),  $\text{NH}_4\text{Cl}$  (0.34),  $\text{KCl}$  (0.34), sodium HEPES (4.69), yeast extract (0.01), glucose (1),  $\text{MgCl}_2 \cdot 6\text{H}_2\text{O}$  (1),  $\text{MgSO}_4 \cdot 7\text{H}_2\text{O}$  (0.1),  $\text{CaCl}_2 \cdot 2\text{H}_2\text{O}$  (0.125), and vitamin  $\text{B}_{12}$  ( $2 \times 10^{-5}$ ); 0.5 mL of trace element solution (1) was added per liter of medium. The trace element solution contained the following compounds in 100 mL of solution: 7.7 N (25%)  $\text{HCl}$  (1.25 mL),  $\text{FeSO}_4 \cdot 7\text{H}_2\text{O}$  (210 mg),  $\text{MnCl}_2 \cdot 4\text{H}_2\text{O}$  (10 mg),  $\text{CoCl}_2 \cdot 6\text{H}_2\text{O}$  (19 mg),  $\text{ZnCl}_2$  (7 mg),  $\text{NiCl}_2$  (1.3 mg),  $\text{CuCl}_2 \cdot 2\text{H}_2\text{O}$  (0.2 mg),  $\text{Na}_2\text{MoO}_4 \cdot 2\text{H}_2\text{O}$  (3.6 mg), and  $\text{H}_3\text{BO}_3$  (0.6 mg).

### Characterization of sewage-derived, anaerobic enrichment cultures by next-generation sequencing of the metagenome and PCR-amplified 16S rRNA genes

Extraction of genomic DNA from toluene-producing enrichment cultures was performed with a bead-beating method involving hexadecyltrimethylammonium bromide (CTAB) extraction buffer described elsewhere (2). Genomic DNA was purified with Allprep DNA/RNA kits (Qiagen, Valencia, CA).

### Metagenome analysis

Construction, sequencing, and assembly of Illumina 270-bp and 4-kb (long mate pair) libraries and PacBio 10-kb libraries are described below:

#### NHPP – Illumina Regular Fragment, 270bp:

100 ng of DNA was sheared to 270 bp using the Covaris LE220 (Covaris) and size selected using SPRI beads (Beckman Coulter). The fragments were treated with end-repair, A-tailing, and ligation of Illumina compatible adapters (IDT, Inc) using the KAPA-Illumina library creation kit (KAPA Biosystems). The prepared library was then quantified using KAPA Biosystems' next-generation sequencing library qPCR kit and run on a Roche LightCycler 480 real-time PCR instrument. The quantified library was then prepared for sequencing on the Illumina HiSeq sequencing platform utilizing a TruSeq paired-end cluster kit, v3, and Illumina's

cBot instrument to generate a clustered flowcell for sequencing. Sequencing of the flowcell was performed on the Illumina HiSeq2000 sequencer using a TruSeq SBS sequencing kit 200 cycles, v3, following a 2x150 indexed run recipe.

NHUT – Illumina Regular LMP, 4kb, CLRS:

5-10 µg of DNA was sheared using the Covaris g-TUBE™ (Covaris) and gel size selected for 4 kb. The sheared DNA was treated with end repair and ligated with biotinylated adapters containing *loxP*. The adapter ligated DNA fragments were circularized via recombination by a Cre excision reaction (NEB). The circularized DNA templates were then randomly sheared using the Covaris LE220 (Covaris). The sheared fragments were treated with end repair and A-tailing using the KAPA-Illumina library creation kit (KAPA Biosystems) followed by immobilization of mate pair fragments on streptavidin beads (Invitrogen). Illumina compatible adapters (IDT, Inc) were ligated to the mate pair fragments and 8 cycles of PCR were used to enrich for the final library (KAPA Biosystems). The prepared library was then quantified using KAPA Biosystems' next-generation sequencing library qPCR kit and run on a Roche LightCycler 480 real-time PCR instrument. The quantified library was then prepared for sequencing on the Illumina HiSeq sequencing platform utilizing a TruSeq paired-end cluster kit, v3, and Illumina's cBot instrument to generate a clustered flowcell for sequencing. Sequencing of the flowcell was performed on the Illumina HiSeq2000 sequencer using a TruSeq SBS sequencing kit 200 cycles, v3, following a 2x150 indexed run recipe.

PB0742 – LC - PacBio 10kb:

Unamplified libraries were generated using Pacific Biosciences standard template preparation protocol for creating 10-kb libraries. 5 µg of gDNA was used to generate the library and the DNA was sheared using a Covaris g-TUBE™ to generate sheared fragments of 10 kb in length. The sheared DNA fragments were then prepared using Pacific Biosciences SMRTbell template preparation kit, where the fragments were treated with DNA damage repair, had their ends repaired so that they were blunt-ended, and 5' phosphorylated. Pacific Biosciences hairpin adapters were then ligated to the fragments to create the SMRTbell template for sequencing. The SMRTbell templates were then purified using exonuclease treatments and size-selected using AMPure PB beads. Sequencing primer was then annealed to the SMRTbell templates and Version P4 sequencing polymerase was bound to them. The prepared SMRTbell template libraries were then sequenced on a Pacific Biosciences RSII sequencer using Version C2 chemistry and 2-hr sequencing movie run times.

Metagenome assembly was carried out as described in Appendix A of this document. Annotation and genome analysis was performed through JGI's IMG/M 4 system (3).

*Microbial community analysis (16S rRNA gene iTags)*

Analysis of microbial community composition based upon Illumina sequencing of 16S rRNA gene amplicons (iTags) is described below and data analysis is documented in Appendix B of this document.

Community DNA samples were received in a 96-well plate for generation of 16S V4 rRNA amplicon libraries for Illumina sequencing. Sample preparation was performed on a PerkinElmer Sciclone NGS G3 Liquid Handling Workstation capable of processing 96 plate-based samples in parallel, utilizing 5 PRIME's HotMasterMix amplification kit and custom amplification primers targeting the V4 region of the 16S rRNA gene. Primers also contained the Illumina sequencing adapter sequence and a unique barcode index sequence specific to each well on the plate, which allowed for multiplexing of prepared amplicons and direct sequencing. Prepared amplicon libraries were then normalized and multiplexed into a single pool of amplicons for the entire plate. The prepared pool of 16S V4 rRNA amplicon libraries were then quantified using KAPA Biosystems' next-generation sequencing library qPCR kit and run on a Roche LightCycler 480 real-time PCR instrument. The quantified pool was then loaded on an Illumina MiSeq sequencer using v3 reagent kit and a 2x300 indexed run recipe.

### **Dialysis for anaerobic *in vitro* assays for phenylacetate decarboxylase activity**

A variety of studies were conducted using *in vitro* assays, including dialysis experiments (Figure HB2). These were conducted with 10-mL D-tube dialyzers (molecular weight cutoff = 3.5 kDa; Novagen, EMD Millipore, Billerica, MA) and a 2-L reservoir of 10 mM sodium phosphate (pH 7.5) as the dialysis buffer. Dialysis was allowed to proceed for 8 hr on ice with constant stirring. All dialyzed controls and samples used 1 mL of dialyzed lysate from the same dialysis tube; undialyzed lysates for controls were kept on ice for 8 hr to be comparable with the dialyzed samples. Dialysis was shown to be effective by independent trials that contained lysate amended with sodium bromide tracer; these trials demonstrated that 99% of the bromide was removed within 4 hr of dialysis.

### **Shotgun proteomic analysis of FPLC fractions by LC-MS/MS**

#### *Extraction and tryptic digestion*

Proteins in selected FPLC fractions were processed for proteomic analysis as previously described (4). Briefly, the proteins were extracted by chloroform/methanol precipitation and resuspended in 100 mM ammonium bicarbonate with 20% acetonitrile. The proteins were reduced with tris(2-carboxyethyl)phosphine (TCEP) for 30 min, followed by incubation with iodoacetamide (IAA; final conc. 10 mM) for 30 min in the dark, and then digested overnight with MS-grade trypsin (1:50 w/w trypsin: protein) at 37°C.

#### *LC-MS/MS analysis*

Digested peptides were analyzed by LC-MS/MS on a Thermo Scientific Q Exactive Orbitrap Mass spectrometer in conjunction with a Proxeon Easy-nLC II HPLC (Thermo Scientific) and Proxeon nanospray source. The digested peptides were loaded onto a 100- $\mu$ m x 25-mm Magic C18 100Å 5U reverse phase trap column where they were desalted online before being separated using a 75- $\mu$ m x 150-mm Magic C18 200Å 3U reverse phase column. Peptides were eluted using a 90-min gradient with a flow rate of 300 nL/min. An MS survey scan was obtained for the *m/z* range 300-1600, MS/MS spectra were acquired using a "top 15" method, where the top 15 ions in the MS spectra were subjected to HCD (High Energy Collisional

Dissociation). An isolation mass window of 2.0  $m/z$  was for the precursor ion selection, and normalized collision energy of 27% was used for fragmentation. A 5-sec duration was used for the dynamic exclusion.

Tandem mass spectra were extracted and charge state deconvoluted by Proteome Discoverer (Thermo Scientific). All MS/MS samples were analyzed using X! Tandem (The GPM, thegpm.org; version TORNADO (2013.02.01.1)). X! Tandem was set up to search a database comprising FASTA translated sequences from the toluene-producing metagenome (IMG Taxon ID 3300001784), the cRAP database of common laboratory contaminants (www.thegpm.org/crap; 114 entries), plus an equal number of reverse protein sequences assuming the digestion enzyme trypsin. X! Tandem was searched with a fragment ion mass tolerance of 20 ppm and a parent ion tolerance of 20 ppm. Iodoacetamide derivative of cysteine was specified in X! Tandem as a fixed modification. Deamidation of asparagine and glutamine, oxidation of methionine and tryptophan, methionine oxidation to sulfone, tryptophan oxidation to formylkynurenine of tryptophan, and acetylation of the N-terminus were specified in X! Tandem as variable modifications.

#### *Criteria for protein identification*

Scaffold (version Scaffold\_4.4.1, Proteome Software Inc., Portland, OR) was used to validate MS/MS-based peptide and protein identifications. Peptide identifications were accepted if they could be established at greater than 85.0% probability by the Scaffold Local FDR algorithm. Protein identifications were accepted if they could be established at greater than 80.0% probability to achieve an FDR less than 5.0% and contained at least 1 identified peptide. Protein probabilities were assigned by the Protein Prophet algorithm (Nesvizhskii et al., 2003, *Anal. Chem.* **75**:4646-58). Proteins that contained similar peptides and could not be differentiated based on MS/MS analysis alone were grouped to satisfy the principles of parsimony. Proteins sharing significant peptide evidence were grouped into clusters.

#### **Analysis of aromatic compounds by GC-MS and liquid chromatography-mass spectrometry (LC-MS)**

Toluene and other volatile aromatic substrates were analyzed by static headspace-electron ionization (EI) GC-MS using a model 7890A GC (Agilent, Santa Clara, CA) with a DB-5 fused silica capillary column (30-m length, 0.25-mm inner diameter, 0.25- $\mu$ m film thickness; Agilent) coupled to an HP 5975C series mass selective detector. The GC oven was held isothermal at 60°C; the injection port temperature was 250°C, and the transfer line temperature was 280°C. The carrier gas, ultra high-purity helium, flowed at a constant rate of 1 ml/min. Injections were manual and splitless, with the split turned on after 1 min. For labeled and unlabeled toluene, selected ion monitoring (SIM) was used to acquire data for  $m/z$  91, 92, and 93 (75 msec dwell time for each ion); other volatile compounds were determined in full-scan mode (50 – 300 amu at 5.5 scans/sec). *p*-Cresol was measured similarly, except that 1- $\mu$ l liquid injections of concentrated hexane extracts were performed with a model 7683B autosampler (Agilent), the MS acquired data in full-scan mode ( $m/z$  50-600 amu, 2.66 scans/sec), and the temperature program was 40°C (hold 3 min) and increase to 295°C at 15°C /min.

For toluene, external standard quantification was performed with 4 or 5 calibration standards that had identical vials and liquid/headspace ratios as the samples. Quantification of [*methyl*-<sup>13</sup>C]toluene, which was the product in all *in vitro* and *in vivo* studies in which phenylacetate or phenylalanine was a substrate, merits additional detail. Since cells and cell-free lysates had some residual unlabeled toluene from cultivation, this had to be corrected for. Unlabeled toluene has 3 distinctive fragment ions at *m/z* 91 (100% relative abundance), *m/z* 92 (59.5%), and *m/z* 93 (4.2%). [*Methyl*-<sup>13</sup>C]toluene has a spectrum that is shifted up 1 amu, so *m/z* 92 is at 100% and *m/z* 93 is at 59.5%. Since *m/z* 91 occurs only in unlabeled toluene, contributions of unlabeled toluene to the labeled toluene mass spectrum were corrected for by subtracting 59.5% of the *m/z* 91 area from *m/z* 92, and 4.2% of the *m/z* 91 area from *m/z* 93. If [*methyl*-<sup>13</sup>C]toluene was present in a sample, then the ratio of the corrected *m/z* 93 area to the corrected *m/z* 92 area should have been 59.5%. Thus, the corrected *m/z* 93 area was used for [*methyl*-<sup>13</sup>C]toluene quantification only if that ratio was 0.595 (within experimental error).

Analyses of <sup>13</sup>C-labeled phenylacetic acid were made with a LC/MSD SL (Agilent) equipped with a model 1260 Infinity Binary Pump and operated in the electrospray ionization, negative ion mode. The mobile phase flowed at 240  $\mu$ L/min (0–5 min) or 350  $\mu$ L/min (5–10 min) through a Kinetex XB-C18 column (2.6- $\mu$ m particle size, 100 $\text{\AA}$ , 3-mm inner diameter x 100-mm length; Phenomenex). The initial mobile phase composition was 60 vol% A (10 mM formic acid in reagent water) and 40 vol% B (10 mM formic acid in high-purity methanol), then was increased linearly to 80% B at 4 min, decreased linearly to 40% B from 4.7 to 5 min, and remained at 40% B for 5 min to allow the column to re-equilibrate to initial conditions. The sample injection volume was 10  $\mu$ L. Source conditions included 3.5 kV capillary voltage, 250 $^{\circ}$ C drying gas temperature, 12 L/min drying gas flow, and 241 kPa nebulizer pressure. LC/MS/MS data acquisition for <sup>13</sup>C-labeled phenylacetic acid was in the SIM mode at *m/z* 136.2. Four-point calibrations were performed for external standard quantification.

1. **Widdel F, Bak F.** 1992. Gram-negative mesophilic sulfate-reducing bacteria, p. 3352-3378. *In* Balows A, Truper HG, Dworkin M, Harder W, Schleifer K-H (ed.), *The Prokaryotes*. Springer-Verlag, New York.
2. **DeAngelis KM, Brodie EL, DeSantis TZ, Andersen GL, Lindow SE, Firestone MK.** 2009. Selective progressive response of soil microbial community to wild oat roots. *ISME J.* **3**:168-178.
3. **Markowitz VM, Chen IM, Chu K, Szeto E, Palaniappan K, Pillay M, Ratner A, Huang J, Pagani I, Tringe S, Huntemann M, Billis K, Varghese N, Tennessen K, Mavromatis K, Pati A, Ivanova NN, Kyrpides NC.** 2014. IMG/M 4 version of the integrated metagenome comparative analysis system. *Nucleic Acids Res.* **42**:D568-573.
4. **González Fernández-Niño SM, Smith-Moritz AM, Chan LJG, Adams PD, Heazlewood JL, Petzold CJ.** 2015. Standard flow liquid chromatography for shotgun proteomics in bioenergy research. *Frontiers in Bioengineering and Biotechnology* **3**.

## **APPENDIX A**

### **Assembly of metagenomic libraries**

JGI assembly of 1011269 NHUT\_NHPP+pacbio 1011269 is complete.

Allpaths assemblies were run using different estimated genome sizes to sample different coverages using the std and LMP libraries. PBJelly was used to add PacBio data to each individual allpaths assembly. Minimus2 was used to merge all the allpaths contigs with the default metagenome pipeline soap assembly, following by sspace to scaffold contigs over 5 kb.

The assembled contigs stats are as follows:

A C G T N GC GC\_stdev  
Base Content 0.2667 0.2331 0.2339 0.2663 0.0052 0.4670 0.0953

Main genome scaffold total: 78801  
Main genome contig total: 80315  
Main genome scaffold sequence total: 292.867 MB  
Main genome contig sequence total: 291.373 MB 0.510% gap  
Main genome scaffold N/L50: 815/54.927 KB  
Main genome contig N/L50: 1184/38.846 KB  
Max scaffold length: 2.197 MB  
Max contig length: 1.678 MB  
Number of scaffolds > 50 KB: 923  
% main genome in scaffolds > 50 KB: 51.94%

| Minimum Scaffold Length | Number of Scaffolds | Number of Contigs | Total Scaffold Length | Total Contig Length | Scaffold Contig Coverage |
|-------------------------|---------------------|-------------------|-----------------------|---------------------|--------------------------|
| All                     | 78,801              | 80,315            | 292,867,165           | 291,372,904         | 99.49%                   |
| 50                      | 78,801              | 80,315            | 292,867,165           | 291,372,904         | 99.49%                   |
| 100                     | 78,801              | 80,315            | 292,867,165           | 291,372,904         | 99.49%                   |
| 250                     | 74,621              | 76,135            | 291,852,385           | 290,358,134         | 99.49%                   |
| 500                     | 35,969              | 37,483            | 279,551,910           | 278,058,994         | 99.47%                   |
| 1 KB                    | 30,187              | 31,701            | 275,626,303           | 274,134,559         | 99.46%                   |
| 2.5 KB                  | 12,647              | 14,161            | 248,313,962           | 246,823,259         | 99.40%                   |
| 5 KB                    | 5,617               | 7,131             | 224,103,894           | 222,613,923         | 99.34%                   |
| 10 KB                   | 3,529               | 5,043             | 209,617,549           | 208,137,808         | 99.29%                   |
| 25 KB                   | 1,758               | 2,964             | 181,596,860           | 180,448,005         | 99.37%                   |
| 50 KB                   | 923                 | 1,734             | 152,126,584           | 151,363,251         | 99.50%                   |
| 100 KB                  | 424                 | 887               | 117,802,467           | 117,385,505         | 99.65%                   |
| 250 KB                  | 146                 | 347               | 75,814,738            | 75,652,822          | 99.79%                   |
| 500 KB                  | 47                  | 145               | 41,505,252            | 41,424,473          | 99.81%                   |
| 1 MB                    | 12                  | 58                | 18,053,645            | 18,014,403          | 99.78%                   |

Read stats are as follows:

589653354 + 9860 in total (QC-passed reads + QC-failed reads)  
0 + 0 duplicates  
569885297 + 0 mapped (96.65%:0.00%)  
589653354 + 9860 paired in sequencing  
294824248 + 7359 read1  
294829106 + 2501 read2  
535557564 + 0 properly paired (90.83%:0.00%)  
563723540 + 0 with itself and mate mapped  
6161757 + 0 singletons (1.04%:0.00%)  
26850668 + 0 with mate mapped to a different chr  
26850668 + 0 with mate mapped to a different chr (mapQ>=5)

If you have any questions, please let us know: Brian Foster [bfoster@lbl.gov](mailto:bfoster@lbl.gov), Alex Copeland [accopeland@lbl.gov](mailto:accopeland@lbl.gov)



GC Histogram for contigs

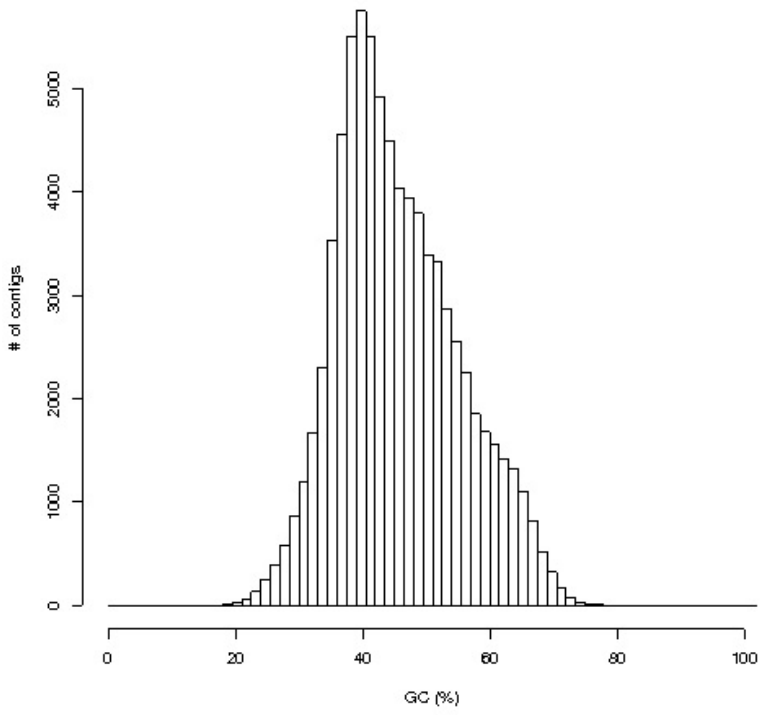

Contigs average fold coverage vs. GC

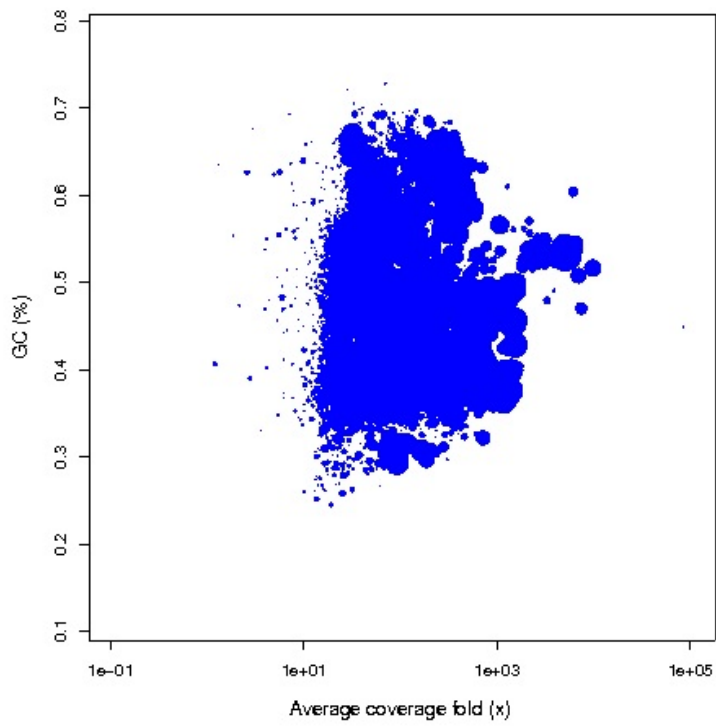

Contigs average fold coverage vs. Contigs Length

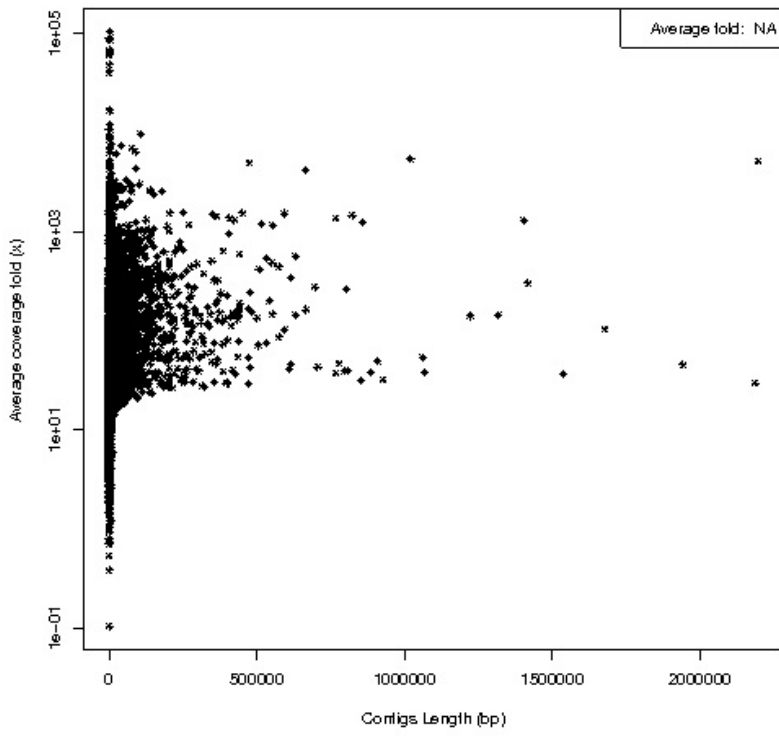

Contigs Coverage vs. Contigs Length

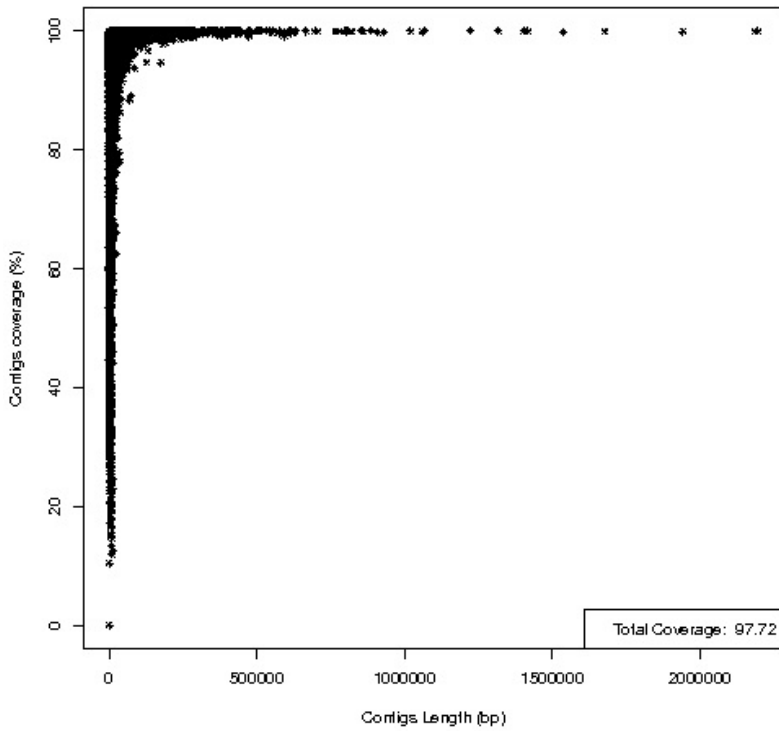

## APPENDIX B

### Informatics of iTag analyses

#### iTagger v1.1 METHODS

The iTagger amplicon analysis pipeline uses several publicly available tools to analyze amplicon libraries, such as 16S rRNA or fungal ITS variable regions for phylogenetic analysis. All libraries to be compared should be identically constructed, sequenced, and analyzed.

#### I. INPUT:

(1) Configuration file in INI format with parameters and paths of reference databases.

OUTPUT: The config file is copied to <OUTDIR>/config.ini

(2) Libraries tabular file indicates library/condition name and path to Fastq file.

#### II. READ QC:

Each library's Fastq file is processed as described below and the results are saved in the data/ folder, which also includes a readQC.log file which indicates the read-pairs at each step and the percentage of pairs which pass each step (i.e. percentages are per-step, not of total input).

OUTPUT: Saved in <OUTDIR>/data/<LIB\_NAME>/

Summarized in readQC.log

(1) CONTAM FILTER: Filter one or more contaminants using Duk (e.g. PhiX control, sequencing library adapter dimers, human contaminants, etc.). For paired reads, the entire pair is filtered if one end-read has a high-scoring hit.

OUTPUT: duk.log

(2) PRIMER TRIM: PCR primers (of the conserved region) are trimmed away. For paired-end reads, both forward and reverse primers must be found, otherwise the entire pair is filtered.

(3) HARD TRIM: For particular libraries (e.g. fungal ITS), it is useful to trim a predefined number of bases from the 5' and 3' ends of the sequence. For fungal ITS, we observed better RDP Classifier results after trimming conserved regions. We do not recommend hard trimming for 16S sequences.

(4) ITERATIVE PAIR MERGING: Reads are trimmed as a pair, removing the last base from whichever end has the highest expected error in a window 5bp wide. Reads are trimmed from mean + 3 standard deviations to mean - 3 standard deviations in 0.5 standard deviation steps. After each trimming step, pairs are merged into single sequences with either Flash or Pandaseq. Pairs which are not merged continue to the next round of trimming. Paired reads which are not combined are discarded.

OUTPUT: Not-combined reads, nc.fastq.bz2

(5) EXPECTED-ERROR FILTER: Merged reads are filtered if they have an expected number of errors which exceeds the threshold. The config file indicates the maximum number of expected errors per 100bp. Note that Flash and Pandaseq produce different quality scores in the overlap-assembled regions.

OUTPUT: Filtered extended reads, ex.fastq.bz2

Quality report, qualStat.pdf, qualStat.tsv

(7) DEREPLICATE: Count the number of times each sequence is observed and output in tabular (seq-obs) format, ordered by sequence.

OUTPUT: seqobs.tsv.bz2

### III. CLUSTERING:

USEARCH is used for clustering, although there is a provision for iterative clustering which can (a) provide faster processing and (b) allow processing of larger files than can normally be processed (particularly with the 32bit version). RDP Classifier is used for taxonomic classification of the resultant cluster centroid sequences and its accuracy is dependent upon providing a well-curated RDP reference database.

OUTPUT: Saved in <OUTDIR>/otu

Summarized in cluster.log

(1) MERGE LIBRARIES: The seq-obs files for all libraries are merged, dereplicated, and sorted by decreasing abundance. Low-abundance sequences are separated and excluded from clustering, step 2 (although they will be mapped and counted in step 3).

(2) ITERATIVE CLUSTER OTUS: Refer to the USEARCH documentation for the algorithm description. Our use of USEARCH differs slightly from that described in the USEARCH documentation in that we iterate between single-threaded clustering and multi-threaded searching in order to reduce run-time. We also use .obs files for tracking cluster members, so a final mapping and counting step (as described in the USEARCH docs) is unnecessary. Clustering is done iteratively starting at 99% identity, and decreasing by 1% identity until the level described in the config file is reached (e.g. 97% for 16S, 95% for Fungal ITS).

(3) MAP LOW-ABUNDANCE SEQUENCES: Rare sequences, which cannot form their own clusters, are mapped to the cluster centroid sequences and counted.

(4) REFERENCE DB CHIMERA FILTER: Centroid sequences are compared to the reference database and likely chimeric sequences discarded, using UCHIME.

OUTPUT: Final cluster centroids, otu.fasta.bz2

(5) CLASSIFICATION: Assign taxonomic classification to each cluster using RDP Classifier. The config file indicates a taxonomic level (e.g. family) and confidence level (e.g. 0.5) which is used to decide which classifications are useful. Clusters which can be acceptably classified are output to otu.tax.tsv, while the others are written to otu.unk.tsv.

OUTPUT: RDP output, rdp.tsv

Classified OTUs, otu.tax.tsv

Unclassified OTUs, otu.unk.tsv

(6) TAX FILTER: Clusters with classifications which do not match those indicated in the config file are discarded and the desired clusters are written to the otu.tax.filtered.tsv file.

OUTPUT: Final OTU table, otu.tax.filtered.tsv

### IV. TAXONOMIC ANALYSIS:

QIIME is used to manipulate the final OTUs file. A few graphs are generated plus some rarefied tables which may be useful for subsequent analysis.

- (1) GENERATE BIOM: The BIOM JSON file is generated from the OTU tabular file.  
OUTPUT: otu.biom
- (2) ABUNDANCE THRESHOLD: Filter OTUs are assorted levels and calculate alpha diversities.  
OUTPUT: Several files in <OUTDIR>/abundance\_thresholds/
- (3) SINGLE RAREFACTION: This is done at 1000 and at a level calculated from the trimmed mean and standard deviation of the library sizes (10% trimmed, and calc. mean - i \* stdev; while i is the highest number from 2 to 0.5, step 0.5, until the cutoff is above 0).  
OUTPUT: <OUTDIR>/otu/rarefied.1000.biom, rarefied.1000.filtered.biom  
<OUTDIR>/otu/rarefied.<X>.biom, rarefied.<X>.filtered.biom
- (4) SUMMARIZE TAXONOMY: with both relative and absolute abundance  
OUTPUT: <OUTDIR>/tax\_mapping/relative/  
<OUTDIR>/tax\_mapping/absolute/
- (5) PLOT RANK-ABUNDANCE: Generate PDF rank-abundance graph of all samples.  
OUTPUT: <OUTDIR>/otu/log\_rank\_abundance.pdf
- (6) PLOT TAXA SUMMARY: Make taxa plot of absolute abundance  
OUTPUT: <OUTDIR>/tax\_mapping/plots/
- (7) PHYLUM BARPLOT: generate a phylum-level barplot using absolute abundance for a quick overview of the data.  
OUTPUT: <OUTDIR>/tax\_mapping/taxonomy\_phylum\_L2.tab

\* \* \*

iTagger was written by Julien Tremblay (julien.tremblay@mail.mcgill.ca) and Edward Kirton (ESKirton@LBL.gov) and is Copyright (c) 2013 by the US DOE Joint Genome Institute but is freely available for use without any warranty under the same license as Perl itself. v1.1 was released 12/12/2013. Refer to wrapped tools for their author and license information.

\* \* \*

External executable versions:

duk: Version 1.05  
cutadapt: 1.2.1  
FLASH v1.2.6  
pandaseq 2.5 <andre@masella.name>  
usearch v7.0.959\_i86linux32  
RDP Classifier: /usr/common/jgi/statistics/rdp-classifier/2.5/rdp\_classifier-2.5.jar  
QIIME: /usr/common/jgi/frameworks/qiime/1.7.0/bin/alpha\_diversity.py

## SUPPLEMENTARY INFORMATION

### Figures S1 – S3

#### *In vitro* Characterization of Phenylacetate Decarboxylase, a Novel Enzyme Catalyzing Toluene Biosynthesis in an Anaerobic Microbial Community

K. Zargar<sup>1</sup>, R. Saville<sup>1</sup>, R. Phelan<sup>1,2</sup>, S. G. Tringe<sup>3</sup>, C. J. Petzold<sup>1,4</sup>, J. D. Keasling<sup>1, 4,5,6</sup>,  
H. R. Beller\*<sup>1,7</sup>

Joint BioEnergy Institute (JBEI), 5885 Hollis Avenue, Emeryville, CA, USA<sup>1</sup>; QB3 Institute, University of California, Berkeley, California 94270, United States<sup>2</sup>; Joint Genome Institute, 2800 Mitchell Drive, Walnut Creek, CA, USA<sup>3</sup>; Biological Systems and Engineering, Lawrence Berkeley National Laboratory (LBNL), Berkeley, CA, USA<sup>4</sup>; Departments of Chemical & Biomolecular Engineering and of Bioengineering, University of California, Berkeley, CA, USA<sup>5</sup>; Novo Nordisk Foundation Center for Biosustainability, Technical University of Denmark, Kogle Allé, DK2970-Hørsholm, Denmark<sup>6</sup>; Earth and Environmental Sciences, LBNL, Berkeley, CA, USA<sup>7</sup>

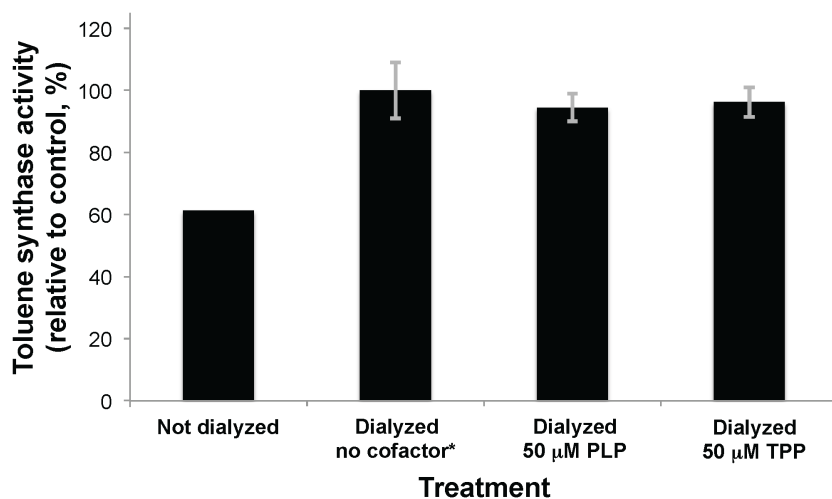

**Figure S1.** Phenylacetate decarboxylase activity in clarified lysates of sewage-derived enrichment cultures: undialyzed lysate, dialyzed lysate with no amendments (negative control), dialyzed lysate amended with pyridoxal-5'-phosphate (PLP), dialyzed lysate amended with thiamine pyrophosphate (TPP). PLP and TPP are common decarboxylation co-factors<sup>1,2</sup>. Bars are normalized to the negative control. Error bars represent one standard deviation.

- 1 Li, T., Huo, L., Pulley, C. & Liu, A. Decarboxylation mechanisms in biological system. *Bioorg. Chem.* **43**, 2-14, doi:10.1016/j.bioorg.2012.03.001 (2012).
- 2 Jordan, F. & Patel, H. Catalysis in Enzymatic Decarboxylations: Comparison of Selected Cofactor-dependent and Cofactor-independent Examples. *ACS Catal.* **3**, 1601-1617, doi:10.1021/cs400272x (2013).

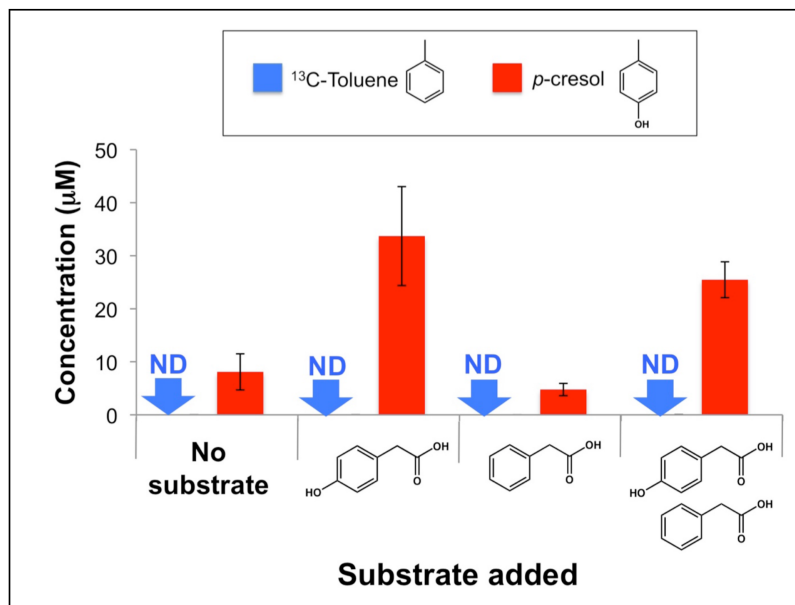

**Figure S2.** Toluene and *p*-cresol production from phenylacetate and *p*-hydroxyphenylacetate, respectively, in clarified cell lysates of *Clostridium scatologenes*, which natively expresses a *p*-hydroxyphenylacetate decarboxylase (CsdBC). ND, not detected. Error bars represent one standard deviation. The background level of *p*-cresol apparent in the assays is a consequence of carryover from the original *C. scatologenes* cultures, which were grown in the presence of both *p*-hydroxyphenylacetate and phenylacetate.



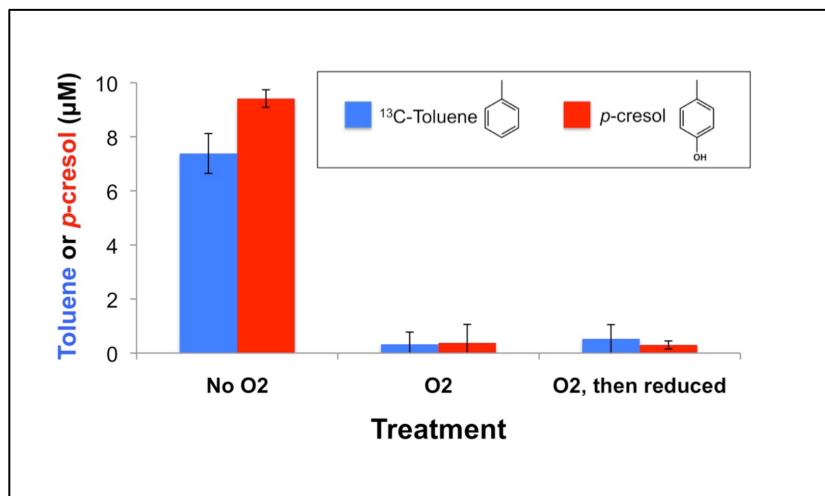

**Figure S3.** Toluene and *p*-cresol production from phenylacetate and *p*-hydroxyphenylacetate, respectively, in clarified lysates with no O<sub>2</sub> exposure, after O<sub>2</sub> exposure, and after O<sub>2</sub> exposure and subsequent reduction with dithiothreitol.

Zargar, Saville, Phelan, Tringe, Petzold, Keasling, and Beller. *In vitro* Characterization of Phenylacetate Decarboxylase, a Novel Enzyme Catalyzing Toluene Biosynthesis in an Anaerobic Microbial Community, *Scientific Reports*

**Table S1. Results of 16S rRNA gene iTag analysis of toluene-producing enrichment culture**

| Taxon (genus level)                                                                                                            | Relative abundance in community | i.e., 67% |
|--------------------------------------------------------------------------------------------------------------------------------|---------------------------------|-----------|
| k__Bacteria;p__Proteobacteria;c__Gammaproteobacteria;o__Enterobacteriales;f__Enterobacteriaceae;;Other                         | 6.7E-01                         |           |
| k__Bacteria;p__Firmicutes;c__Clostridia;o__Clostridiales;f__Veillonellaceae;g__Acidaminococcus;                                | 7.5E-02                         |           |
| k__Bacteria;p__Proteobacteria;c__Deltaproteobacteria;o__Desulfovibrionales;f__Desulfovibrionaceae;g__Desulfovibrio;            | 3.9E-02                         |           |
| k__Archaea;p__Euryarchaeota;c__Methanobacteria;o__Methanobacteriales;f__Methanobacteriaceae;g__Methanobacterium;               | 3.6E-02                         |           |
| k__Bacteria;p__Proteobacteria;c__Gammaproteobacteria;o__Enterobacteriales;f__Enterobacteriaceae;g__Kluyvera;                   | 3.0E-02                         |           |
| k__Bacteria;p__Bacteroidetes;c__Bacteroidia;o__Bacteroidales;;Other;Other                                                      | 2.9E-02                         |           |
| k__Bacteria;p__Bacteroidetes;;Other;Other;Other;Other                                                                          | 2.3E-02                         |           |
| k__Bacteria;p__Actinobacteria;c__Actinobacteria (class);o__Coriobacteriales;f__Coriobacteriaceae;g__Atopobium;                 | 2.2E-02                         |           |
| k__Bacteria;p__Bacteroidetes;c__Bacteroidia;o__Bacteroidales;f__Prevotellaceae;g__Prevotella;                                  | 1.4E-02                         |           |
| k__Bacteria;p__Tenericutes;c__Erysipelotrichi;o__Erysipelotrichales;f__Erysipelotrichaceae;g__Bulleidia;                       | 1.2E-02                         |           |
| k__Bacteria;p__Spirochaetes;c__Spirochaetes (class);o__Spirochaetales;f__Spirochaetaceae;g__Treponema;                         | 6.3E-03                         |           |
| k__Bacteria;p__Tenericutes;c__Erysipelotrichi;o__Erysipelotrichales;f__vadinHA31;g__RFN20;                                     | 4.8E-03                         |           |
| k__Bacteria;p__Firmicutes;c__Clostridia;o__Clostridiales;f__Ruminococcaceae;g__Oscillospira;                                   | 4.8E-03                         |           |
| k__Bacteria;;Other;Other;Other;Other;Other                                                                                     | 3.2E-03                         |           |
| k__Bacteria;p__Bacteroidetes;c__Bacteroidia;o__Bacteroidales;f__Bacteroidaceae;g__Bacteroides;                                 | 2.8E-03                         |           |
| k__Bacteria;p__Firmicutes;c__Clostridia;o__Clostridiales;f__Lachnospiraceae;g__Butyrivibrio;                                   | 2.4E-03                         |           |
| k__Bacteria;p__Proteobacteria;c__Betaproteobacteria;o__Rhodocyclales;f__Rhodocyclaceae;;Other                                  | 2.4E-03                         |           |
| k__Bacteria;p__Firmicutes;c__Clostridia;o__Clostridiales;f__Eubacteriaceae;g__Eubacterium;                                     | 2.3E-03                         |           |
| k__Bacteria;p__Firmicutes;c__Clostridia;o__Clostridiales;;Other;Other                                                          | 2.3E-03                         |           |
| k__Bacteria;p__Proteobacteria;c__Gammaproteobacteria;;Other;Other;Other                                                        | 2.1E-03                         |           |
| k__Bacteria;p__Firmicutes;c__Clostridia;o__Clostridiales;f__Ruminococcaceae;;Other                                             | 2.0E-03                         |           |
| k__Bacteria;p__Firmicutes;c__Clostridia;o__Clostridiales;f__Veillonellaceae;g__Megasphaera;                                    | 1.9E-03                         |           |
| k__Bacteria;p__Firmicutes;c__Clostridia;o__Clostridiales;f__Lachnospiraceae;;Other                                             | 1.1E-03                         |           |
| k__Bacteria;p__Firmicutes;c__Clostridia;o__Clostridiales;f__Clostridiaceae;g__Clostridium;                                     | 9.2E-04                         |           |
| k__Bacteria;p__Actinobacteria;c__Actinobacteria (class);o__Coriobacteriales;f__Coriobacteriaceae;;Other                        | 8.9E-04                         |           |
| k__Bacteria;p__Firmicutes;c__Clostridia;o__Clostridiales;f__Veillonellaceae;g__Selenomonas;                                    | 7.2E-04                         |           |
| k__Bacteria;p__Firmicutes;;Other;Other;Other;Other                                                                             | 6.8E-04                         |           |
| k__Bacteria;p__Firmicutes;c__Clostridia;;Other;Other;Other                                                                     | 6.6E-04                         |           |
| k__chloro_Populus;p__chloro_Populus;c__chloro_Populus;o__chloro_Populus;f__chloro_Populus;g__chloro_Populus;                   | 6.3E-04                         |           |
| k__Bacteria;p__Firmicutes;c__Clostridia;o__Clostridiales;f__Ruminococcaceae;g__Ruminococcus;                                   | 6.1E-04                         |           |
| k__Bacteria;p__Firmicutes;c__Clostridia;o__Clostridiales;f__Veillonellaceae;g__Anaeroglobus;                                   | 5.6E-04                         |           |
| k__Bacteria;p__Bacteroidetes;c__Sphingobacteria;o__Sphingobacteriales;;Other;Other                                             | 5.6E-04                         |           |
| k__Bacteria;p__Proteobacteria;c__Epsilonproteobacteria;o__Campylobacterales;f__Campylobacteraceae;g__Sulfurospirillum;         | 5.5E-04                         |           |
| k__Bacteria;p__Proteobacteria;;Other;Other;Other;Other                                                                         | 5.4E-04                         |           |
| k__Bacteria;p__Acidobacteria;c__Acidobacteria (class);o__Acidobacteriales;f__Acidobacteriaceae;g__Terriglobus;                 | 4.6E-04                         |           |
| k__Bacteria;p__Bacteroidetes;c__Bacteroidia;o__Bacteroidales;f__Porphyromonadaceae;;Other                                      | 4.5E-04                         |           |
| k__Bacteria;p__Firmicutes;c__Clostridia;o__Clostridiales;f__Veillonellaceae;;Other                                             | 4.3E-04                         |           |
| k__Archaea;p__Euryarchaeota;c__Methanomicrobia;o__Methanosarcinales;f__Methanosarcinaceae;g__Methanosarcina;                   | 3.3E-04                         |           |
| k__Bacteria;p__Firmicutes;c__Clostridia;o__Clostridiales;f__Ruminococcaceae;g__Anaerofilum;                                    | 3.1E-04                         |           |
| k__Bacteria;p__Firmicutes;c__Clostridia;o__Clostridiales;f__Ruminococcaceae;g__Subdoligranulum;                                | 3.1E-04                         |           |
| k__Bacteria;p__Proteobacteria;c__Deltaproteobacteria;o__Desulfovibrionales;;Other;Other                                        | 3.0E-04                         |           |
| k__Bacteria;p__Firmicutes;c__Clostridia;o__Clostridiales;f__Lachnospiraceae;g__Coprococcus;                                    | 2.9E-04                         |           |
| k__Bacteria;p__Proteobacteria;c__Gammaproteobacteria;o__Pseudomonadales;f__Pseudomonadaceae;g__Pseudomonas;                    | 2.6E-04                         |           |
| k__Bacteria;p__Proteobacteria;c__Gammaproteobacteria;o__Enterobacteriales;f__Enterobacteriaceae;g__Tatumella;                  | 2.3E-04                         |           |
| k__Bacteria;p__Firmicutes;c__Clostridia;o__Clostridiales;f__Lachnospiraceae;g__Moryella;                                       | 2.2E-04                         |           |
| k__Bacteria;p__Spirochaetes;c__Spirochaetes (class);o__Spirochaetales;f__Spirochaetaceae;;Other                                | 2.0E-04                         |           |
| k__Bacteria;p__Proteobacteria;c__Gammaproteobacteria;o__Enterobacteriales;f__Enterobacteriaceae;g__Klebsiella;                 | 2.0E-04                         |           |
| k__mito_Triticum;p__mito_Triticum;c__mito_Triticum;o__mito_Triticum;f__mito_Triticum;g__mito_Triticum;                         | 1.9E-04                         |           |
| k__Bacteria;p__Firmicutes;c__Clostridia;o__Clostridiales;f__Veillonellaceae;g__Mitsuokella;                                    | 1.3E-04                         |           |
| k__Bacteria;p__Firmicutes;c__Clostridia;o__Clostridiales;f__Ruminococcaceae;g__Faecalibacterium;                               | 1.3E-04                         |           |
| k__chloro_Gracilaria;p__chloro_Gracilaria;c__chloro_Gracilaria;o__chloro_Gracilaria;f__chloro_Gracilaria;g__chloro_Gracilaria; | 1.2E-04                         |           |
| k__Bacteria;p__Firmicutes;c__Clostridia;o__Clostridiales;f__Ruminococcaceae;g__Ethanologenens;                                 | 1.2E-04                         |           |
| k__Bacteria;p__Firmicutes;c__Clostridia;o__Clostridiales;f__Eubacteriaceae;;Other                                              | 9.7E-05                         |           |
| k__Bacteria;p__Bacteroidetes;c__Bacteroidia;o__Bacteroidales;f__Porphyromonadaceae;g__Parabacteroides;                         | 7.4E-05                         |           |
| k__Archaea;p__Euryarchaeota;;Other;Other;Other;Other                                                                           | 6.3E-05                         |           |
| k__Bacteria;p__Actinobacteria;c__Actinobacteria (class);o__Coriobacteriales;f__Coriobacteriaceae;g__Coriobacterium;            | 4.3E-05                         |           |
| k__Archaea;p__Euryarchaeota;c__Methanomicrobia;o__Methanomicrobiales;f__Methanomicrobiaceae;g__Methanofollis;                  | 3.6E-05                         |           |

|                                                                                                                    |         |
|--------------------------------------------------------------------------------------------------------------------|---------|
| k_Bacteria;p_Bacteroidetes;c_Bacteroidia;o_Bacteroidales;f_Porphyrimonadaceae;g_Candidatus Azobacteroides;         | 2.9E-05 |
| k_Bacteria;p_Chloroflexi;c_Anaerolineae;o_Anaerolineales;f_Anaerolineaceae;g_WCHB1-05;                             | 2.4E-05 |
| k_Bacteria;p_Firmicutes;c_Clostridia;o_Clostridiales;f_Ruminococcaceae;g_Anaerotruncus;                            | 2.3E-05 |
| k_Bacteria;p_Proteobacteria;c_Deltaproteobacteria;;Other;Other;Other                                               | 2.0E-05 |
| k_Bacteria;p_Proteobacteria;c_Gammaproteobacteria;o_Alteromonadales;f_Alteromonadaceae;;Other                      | 1.9E-05 |
| k_Bacteria;p_Firmicutes;c_Clostridia;o_Clostridiales;f_Dehalobacteriaceae;g_Dehalobacterium;                       | 1.8E-05 |
| k_Bacteria;p_Proteobacteria;c_Betaproteobacteria;;Other;Other;Other                                                | 1.7E-05 |
| k_Bacteria;p_Firmicutes;c_Bacilli;o_Haloplasmatales;f_Haloplasmataceae;g_Haloplasma;                               | 1.7E-05 |
| k_Bacteria;p_Acidobacteria;c_Acidobacteria (class);o_Acidobacteriales;f_Acidobacteriaceae;;Other                   | 1.7E-05 |
| k_Bacteria;p_Proteobacteria;c_Gammaproteobacteria;o_Enterobacteriales;f_Enterobacteriaceae;g_Trabulsiella;         | 1.6E-05 |
| k_Bacteria;p_Firmicutes;c_Clostridia;o_Natranaerobiales;f_Anaerobranchaceae;;Other                                 | 1.6E-05 |
| k_Bacteria;p_Bacteroidetes;c_Flavobacteria;o_Flavobacteriales;f_Flavobacteriaceae;g_Flavobacterium;                | 1.4E-05 |
| k_Bacteria;p_Firmicutes;c_Clostridia;o_Natranaerobiales;f_Anaerobranchaceae;g_KF-Gitt2-16;                         | 1.3E-05 |
| k_Archaea;p_Euryarchaeota;c_Methanobacteria;o_Methanobacteriales;f_Methanobacteriaceae;g_Methanosphaera;           | 1.3E-05 |
| k_mito_Bambusa;p_mito_Bambusa;c_mito_Bambusa;o_mito_Bambusa;f_mito_Bambusa;g_mito_Bambusa;                         | 1.2E-05 |
| k_Bacteria;p_Proteobacteria;c_Deltaproteobacteria;o_Desulfovibrionales;f_Desulfovibrionaceae;;Other                | 1.2E-05 |
| k_Bacteria;p_Proteobacteria;c_Alphaproteobacteria;o_Rhizobiales;f_Rhizobiaceae;g_Rhizobium;                        | 1.2E-05 |
| k_Bacteria;p_Firmicutes;c_Clostridia;o_Clostridiales;f_Lachnospiraceae;g_Anaerostipes;                             | 1.2E-05 |
| k_Bacteria;p_Firmicutes;c_Clostridia;o_Clostridiales;f_Eubacteriaceae;g_Pseudoramibacter;                          | 1.2E-05 |
| k_mito_Megaceros;p_mito_Megaceros;c_mito_Megaceros;o_mito_Megaceros;f_mito_Megaceros;g_mito_Megaceros;             | 9.6E-06 |
| k_Bacteria;p_Proteobacteria;c_Alphaproteobacteria;o_Rhizobiales;f_Bradyrhizobiaceae;g_Rhodopseudomonas;            | 9.6E-06 |
| k_Bacteria;p_Actinobacteria;c_Actinobacteria (class);o_Actinomycetales;f_Streptomyetaceae;g_Streptomyces;          | 9.6E-06 |
| k_Bacteria;p_Acidobacteria;;Other;Other;Other                                                                      | 9.6E-06 |
| k_Bacteria;p_Tenericutes;c_Erysipelotrichi;o_Erysipelotrichales;f_Erysipelotrichaceae;;Other                       | 8.4E-06 |
| k_Bacteria;p_Tenericutes;c_Erysipelotrichi;o_Erysipelotrichales;;Other;Other                                       | 8.4E-06 |
| k_Bacteria;p_Proteobacteria;c_Betaproteobacteria;o_Burkholderiales;f_Comamonadaceae;;Other                         | 8.4E-06 |
| k_Bacteria;p_Firmicutes;c_Clostridia;o_Clostridiales;f_Veillonellaceae;g_Thermosinus;                              | 8.4E-06 |
| k_Bacteria;p_Chlorobi;c_Ignavibacteria;o_Ignavibacteriales;f_Ignavibacteriaceae;g_Ignavibacterium;                 | 8.4E-06 |
| k_Bacteria;p_Proteobacteria;c_Gammaproteobacteria;o_Pseudomonadales;f_Moraxellaceae;g_Acinetobacter;               | 7.2E-06 |
| k_Bacteria;p_Proteobacteria;c_Gammaproteobacteria;o_Enterobacteriales;f_Enterobacteriaceae;g_Cedecea;              | 7.2E-06 |
| k_Bacteria;p_Proteobacteria;c_Deltaproteobacteria;o_Desulfovibrionales;f_Desulfohalobiaceae;;Other                 | 7.2E-06 |
| k_Bacteria;p_Synergistetes;c_Synergistia;o_Synergistales;f_Synergistaceae;g_Candidatus Tammella;                   | 6.0E-06 |
| k_Bacteria;p_Proteobacteria;c_Gammaproteobacteria;o_Enterobacteriales;f_Enterobacteriaceae;g_Shigella;             | 6.0E-06 |
| k_Bacteria;p_Proteobacteria;c_Alphaproteobacteria;o_Rhizobiales;f_Rhizobiaceae;g_Agrobacterium;                    | 6.0E-06 |
| k_Bacteria;p_Firmicutes;c_Clostridia;o_Clostridiales;f_Eubacteriaceae;g_Acetobacterium;                            | 6.0E-06 |
| k_Bacteria;p_Chloroflexi;c_Anaerolineae;o_Anaerolineales;f_Anaerolinaceae;;Other                                   | 6.0E-06 |
| k_Bacteria;p_Actinobacteria;c_Actinobacteria (class);;Other;Other;Other                                            | 6.0E-06 |
| k_Bacteria;p_Proteobacteria;c_Betaproteobacteria;o_Burkholderiales;f_Comamonadaceae;g_Variovorax;                  | 4.8E-06 |
| k_Bacteria;p_Bacteroidetes;c_Sphingobacteria;o_Sphingobacteriales;f_Flammeovirgaceae;;Other                        | 4.8E-06 |
| k_Bacteria;p_Bacteroidetes;c_Flavobacteria;o_Flavobacteriales;f_Flavobacteriaceae;g_Chryseobacterium;              | 4.8E-06 |
| k_Archaea;p_Euryarchaeota;c_Methanobacteria;o_Methanobacteriales;f_Methanobacteriaceae;g_Methanobrevibacter;       | 4.8E-06 |
| k_chloro_Nicotiana;p_chloro_Nicotiana;c_chloro_Nicotiana;o_chloro_Nicotiana;f_chloro_Nicotiana;g_chloro_Nicotiana; | 3.6E-06 |
| k_chloro_Chlorella;p_chloro_Chlorella;c_chloro_Chlorella;o_chloro_Chlorella;f_chloro_Chlorella;g_chloro_Chlorella; | 3.6E-06 |
| k_Bacteria;p_Synergistetes;c_Synergistia;o_Synergistales;f_Synergistaceae;g_Synergistes;                           | 3.6E-06 |
| k_Bacteria;p_Proteobacteria;c_Gammaproteobacteria;o_Enterobacteriales;f_Enterobacteriaceae;g_Averyella;            | 3.6E-06 |
| k_Bacteria;p_Proteobacteria;c_Alphaproteobacteria;o_Caulobacteriales;f_Caulobacteraceae;g_Phenylobacterium;        | 3.6E-06 |
| k_Bacteria;p_Actinobacteria;c_Actinobacteria (class);o_Actinomycetales;f_Streptosporangiaceae;g_Nonumurea;         | 3.6E-06 |
| k_mito_Zea;p_mito_Zea;c_mito_Zea;o_mito_Zea;f_mito_Zea;g_mito_Zea;                                                 | 2.4E-06 |
| k_mito_Nicotiana;p_mito_Nicotiana;c_mito_Nicotiana;o_mito_Nicotiana;f_mito_Nicotiana;g_mito_Nicotiana;             | 2.4E-06 |
| k_Metazoa;;Other;Other;Other;Other;Other                                                                           | 2.4E-06 |
| k_Bacteria;p_Proteobacteria;c_Gammaproteobacteria;o_Xanthomonadales;f_Xanthomonadaceae;g_Stenotrophomonas;         | 2.4E-06 |
| k_Bacteria;p_Proteobacteria;c_Gammaproteobacteria;o_Enterobacteriales;f_Enterobacteriaceae;g_Yersinia;             | 2.4E-06 |
| k_Bacteria;p_Proteobacteria;c_Gammaproteobacteria;o_Enterobacteriales;f_Enterobacteriaceae;g_Salmonella;           | 2.4E-06 |
| k_Bacteria;p_Proteobacteria;c_Betaproteobacteria;o_Burkholderiales;f_Oxalobacteraceae;g_Massilia;                  | 2.4E-06 |
| k_Bacteria;p_Proteobacteria;c_Alphaproteobacteria;o_Sphingomonadales;f_Sphingomonadaceae;;Other                    | 2.4E-06 |
| k_Bacteria;p_Proteobacteria;c_Alphaproteobacteria;o_Rhizobiales;f_Hyphomicrobiaceae;g_Rhodoplanes;                 | 2.4E-06 |
| k_Bacteria;p_Firmicutes;c_Clostridia;o_Clostridiales;f_Lachnospiraceae;g_Johnsonella;                              | 2.4E-06 |
| k_Bacteria;p_Firmicutes;c_Bacilli;;Other;Other;Other                                                               | 2.4E-06 |
| k_Bacteria;p_Bacteroidetes;c_Flavobacteria;o_Flavobacteriales;f_Flavobacteriaceae;;Other                           | 2.4E-06 |
| k_Archaea;;Other;Other;Other;Other;Other                                                                           | 2.4E-06 |

**Table S2. Shotgun proteomic results for FPLC fractions 18 (inactive) and 19 (active) in Figure 2 [results only shown for proteins having greater total unique peptides in active fraction]**

\* Total unique peptides  
Ranked according to F19 - F18

| Locus tag                  | F18 (inactive)* | F19 (active)* | F19-F18 diff.* | COG  | COG alpha | EC        | KO     | Pfam  | Best JGI annotation                                                                                                    |
|----------------------------|-----------------|---------------|----------------|------|-----------|-----------|--------|-------|------------------------------------------------------------------------------------------------------------------------|
| JGI20225J20221_100038726   | 149             | 221           | 72             | 4058 | H         | 2.8.4.1   | K00399 | 2745  | Methyl coenzyme M reductase, alpha subunit                                                                             |
| JGI20225J20221_100038725   | 89              | 147           | 58             | 4057 | H         | 2.8.4.1   | K00402 | 2240  | Methyl coenzyme M reductase, gamma subunit                                                                             |
| JGI20225J20221_10000011633 | 23              | 63            | 40             | 191  | G         | 4.1.2.13  | K01624 | 1116  | Fructose/tagatose bisphosphate aldolase                                                                                |
| JGI20225J20221_10000011513 | 81              | 118           | 37             | 148  | G         | 4.2.1.11  | K01689 | 113   | Enolase                                                                                                                |
| JGI20225J20221_100050178   | 6               | 42            | 36             | 282  | C         | 2.7.2.1   | K00925 | 871   | Acetate kinase                                                                                                         |
| JGI20225J20221_100038722   | 81              | 115           | 34             | 4054 | H         | 2.8.4.1   | K00401 | 2241  | Methyl coenzyme M reductase, beta subunit                                                                              |
| JGI20225J20221_10008678    | 31              | 63            | 32             | 4624 | C         | 1.6.5.3   | K00336 | 2906  | Iron only hydrogenase large subunit, C-terminal domain                                                                 |
| JGI20225J20221_1000001608  | 28              | 56            | 28             | 1882 | C         | 2.3.1.54  | K00656 | 2901  | Pyruvate-formate lyase                                                                                                 |
| JGI20225J20221_10000011884 | 12              | 36            | 24             | 137  | E         | 6.3.4.5   | K01940 | 764   | Argininosuccinate synthase                                                                                             |
| JGI20225J20221_1000250202  | 20              | 41            | 21             | 4624 | C         | 1.6.5.3   | K00336 | 2906  | Iron only hydrogenase large subunit, C-terminal domain                                                                 |
| JGI20225J20221_10005705    | 13              | 34            | 21             | 22   | C         | 1.2.4.1   | K00162 | 2779  | Pyruvate/2-oxoglutarate dehydrogenase complex, dehydrogenase (E1) component, eukaryotic type, beta subunit             |
| JGI20225J20221_1000079825  | 21              | 39            | 18             | 57   | G         | 1.2.1.12  | K00134 | 44    | Glyceraldehyde-3-phosphate dehydrogenase/erythrose-4-phosphate dehydrogenase                                           |
| JGI20225J20221_1000014106  | 10              | 28            | 18             | 362  | G         | 1.1.1.44  | K00033 | 393   | 6-phosphogluconate dehydrogenase                                                                                       |
| JGI20225J20221_1000084518  | 14              | 30            | 16             | 1866 | C         | 4.1.1.49  | K01610 | 1293  | Phosphoenolpyruvate carboxykinase (ATP)                                                                                |
| JGI20225J20221_1000004958  | 2               | 18            | 16             | 1148 | C         | 1.8.98.1  | K03388 | 7992  | Heterodisulfide reductase, subunit A and related polyferredoxins                                                       |
| JGI20225J20221_100002653   | 0               | 15            | 15             | 1960 | I         | 1.3.8.1   | K00248 | 441   | Acyl-CoA dehydrogenases                                                                                                |
| JGI20225J20221_10000041265 | 0               | 13            | 13             | 3259 | C         | 1.12.99.- | K14126 | 374   | Coenzyme F420-reducing hydrogenase, alpha subunit                                                                      |
| JGI20225J20221_10000012039 | 22              | 35            | 13             | 50   | J         |           | K02358 | 9     | GTPases - translation elongation factors                                                                               |
| JGI20225J20221_10000011162 | 0               | 13            | 13             | 450  | V         | 1.11.1.15 | K03386 | 578   | Peroxiredoxin                                                                                                          |
| JGI20225J20221_10005704    | 0               | 12            | 12             | 1071 | C         | 1.2.4.1   | K00161 | 676   | Pyruvate/2-oxoglutarate dehydrogenase complex, dehydrogenase (E1) component, eukaryotic type, alpha subunit            |
| JGI20225J20221_10000011627 | 17              | 29            | 12             | 111  | HR        | 1.1.1.95  | K00058 | 2826  | Phosphoglycerate dehydrogenase and related dehydrogenases                                                              |
| JGI20225J20221_1000004820  | 42              | 53            | 11             | 1927 | C         | 1.5.99.9  | K00319 | 1993  | Coenzyme F420-dependent N(5),N(10)-methyltetrahydromethanopterin dehydrogenase                                         |
| JGI20225J20221_100066655   | 0               | 11            | 11             | 111  | HR        | 1.1.1.95  | K00058 | 2826  | Phosphoglycerate dehydrogenase and related dehydrogenases                                                              |
| JGI20225J20221_10008677    | 12              | 22            | 10             | 1894 | C         | 1.6.5.3   | K00335 | 1512  | NADH:ubiquinone oxidoreductase, NADH-binding (51 kD) subunit                                                           |
| JGI20225J20221_10187692    | 0               | 10            | 10             | 1960 | I         |           | K00257 | 441   | Acyl-CoA dehydrogenases                                                                                                |
| JGI20225J20221_100251813   | 0               | 10            | 10             | 1960 | I         |           | K00257 | 441   | Acyl-CoA dehydrogenases                                                                                                |
| JGI20225J20221_10221552    | 0               | 9             | 9              | 1454 | C         | 1.1.1.1   | K13954 | 465   | Alcohol dehydrogenase, class IV                                                                                        |
| JGI20225J20221_1000001216  | 0               | 9             | 9              | 171  | H         | 6.3.1.5   | K01916 | 2540  | NAD synthase                                                                                                           |
| JGI20225J20221_100002933   | 23              | 32            | 9              | 264  | J         |           | K02357 | 889   | Translation elongation factor Ts                                                                                       |
| JGI20225J20221_100174214   | 2               | 11            | 9              | 9    |           | 2.1.1.90  | K04480 | 12176 | Methanol-cobalamin methyltransferase B subunit                                                                         |
| JGI20225J20221_100035070   | 3               | 11            | 8              | 2352 | C         | 4.1.1.31  | K01595 | 311   | Phosphoenolpyruvate carboxylase                                                                                        |
| JGI20225J20221_100029386   | 5               | 13            | 8              | 22   | C         | 1.2.4.1   | K00162 | 2779  | Pyruvate/2-oxoglutarate dehydrogenase complex, dehydrogenase (E1) component, eukaryotic type, beta subunit             |
| JGI20225J20221_100047250   | 22              | 30            | 8              | 574  | G         | 2.7.9.1   | K01006 | 2896  | Phosphoenolpyruvate synthase/pyruvate phosphate dikinase                                                               |
| JGI20225J20221_100111320   | 16              | 24            | 8              | 191  | G         | 4.1.2.13  | K01624 | 1116  | Fructose/tagatose bisphosphate aldolase                                                                                |
| JGI20225J20221_1000014397  | 12              | 20            | 8              | 2190 | G         | 2.7.1.69  | K02777 | 358   | Phosphotransferase system IIA components                                                                               |
| JGI20225J20221_1000029176  | 19              | 27            | 8              | 443  | O         |           | K04043 | 12    | Molecular chaperone                                                                                                    |
| JGI20225J20221_10000011125 | 0               | 8             | 8              | 544  | O         |           | K03545 | 5697  | FKBP-type peptidyl-prolyl cis-trans isomerase (trigger factor)                                                         |
| JGI20225J20221_10044662    | 5               | 12            | 7              | 1529 | C         |           |        | 2738  | Aerobic-type carbon monoxide dehydrogenase, large subunit CoxL/CutL homologs                                           |
| JGI20225J20221_1000079191  | 2               | 9             | 7              | 674  | C         | 1.2.7.-   | K03737 | 1855  | Pyruvate:ferredoxin oxidoreductase and related 2-oxoacid:ferredoxin oxidoreductases, alpha subunit                     |
| JGI20225J20221_1000084466  | 0               | 7             | 7              | 674  | C         | 1.2.7.-   | K03737 | 1855  | Pyruvate:ferredoxin oxidoreductase and related 2-oxoacid:ferredoxin oxidoreductases, alpha subunit                     |
| JGI20225J20221_1000014451  | 2               | 9             | 7              | 150  | F         | 6.3.3.1   | K01933 | 2769  | Phosphoribosylaminoimidazole (AIR) synthetase                                                                          |
| JGI20225J20221_1000014762  | 0               | 7             | 7              | 696  | G         | 5.4.2.1   | K15633 | 1676  | Phosphoglyceromutase                                                                                                   |
| JGI20225J20221_10000041512 | 34              | 41            | 7              | 2141 | HR        | 1.5.99.11 | K00320 | 296   | Coenzyme F420-dependent N5,N10-methylene tetrahydromethanopterin reductase and related flavin-dependent oxidoreductase |
| JGI20225J20221_1000017329  | 0               | 7             | 7              | 1210 | M         | 2.7.7.9   | K00963 | 483   | UDP-glucose pyrophosphorylase                                                                                          |
| JGI20225J20221_10220831    | 3               | 9             | 6              | 674  | C         | 1.2.7.-   | K03737 | 1855  | Pyruvate:ferredoxin oxidoreductase and related 2-oxoacid:ferredoxin oxidoreductases, alpha subunit                     |
| JGI20225J20221_10006669    | 7               | 13            | 6              | 655  | C         |           |        | 3358  | Multimeric flavodoxin WrbA                                                                                             |
| JGI20225J20221_1000014311  | 5               | 11            | 6              | 282  | C         | 2.7.2.1   | K00925 | 871   | Acetate kinase                                                                                                         |
| JGI20225J20221_1000014640  | 3               | 9             | 6              | 55   | C         | 3.6.3.14  | K02112 | 6     | F0F1-type ATP synthase, beta subunit                                                                                   |
| JGI20225J20221_1000011547  | 1               | 7             | 6              | 1150 | C         | 1.8.98.1  | K03390 | 13183 | Heterodisulfide reductase, subunit C                                                                                   |
| JGI20225J20221_100126347   | 0               | 6             | 6              | 55   | C         | 3.6.3.14  | K02112 | 6     | F0F1-type ATP synthase, beta subunit                                                                                   |
| JGI20225J20221_10058031    | 0               | 6             | 6              | 1866 | C         | 4.1.1.49  | K01610 | 1293  | Phosphoenolpyruvate carboxykinase (ATP)                                                                                |
| JGI20225J20221_1000011685  | 0               | 6             | 6              | 221  | CP        | 3.6.1.1   | K01507 | 719   | Inorganic pyrophosphatase                                                                                              |
| JGI20225J20221_10000012148 | 17              | 23            | 6              | 683  | E         |           | K01999 | 13458 | ABC-type branched-chain amino acid transport systems, periplasmic component                                            |
| JGI20225J20221_10000011636 | 9               | 15            | 6              | 21   | G         | 2.2.1.1   | K00615 | 456   | Transketolase                                                                                                          |
| JGI20225J20221_1000001180  | 3               | 9             | 6              | 574  | G         | 2.7.9.2   | K01007 | 1326  | Phosphoenolpyruvate synthase/pyruvate phosphate dikinase                                                               |
| JGI20225J20221_1000001826  | 0               | 6             | 6              | 588  | G         | 5.4.2.1   | K01834 | 300   | Phosphoglycerate mutase 1                                                                                              |
| JGI20225J20221_1000084443  | 0               | 6             | 6              | 448  | G         | 2.7.2.7   | K00975 | 483   | ADP-glucose pyrophosphorylase                                                                                          |
| JGI20225J20221_100043370   | 0               | 6             | 6              | 1812 | H         | 2.5.1.6   | K00789 | 1941  | Archaeal S-adenosylmethionine synthetase                                                                               |
| JGI20225J20221_10000011052 | 0               | 6             | 6              | 652  | O         | 5.2.1.8   | K03768 | 160   | Peptidyl-prolyl cis-trans isomerase (rotamase) - cyclophilin family                                                    |
| JGI20225J20221_10000012202 | 0               | 6             | 6              | 589  | T         |           | K06149 | 582   | Universal stress protein UspA and related nucleotide-binding proteins                                                  |
| JGI20225J20221_1000001308  | 33              | 38            | 5              | 538  | C         | 1.1.1.42  | K00031 | 180   | Isocitrate dehydrogenases                                                                                              |
| JGI20225J20221_1000250203  | 12              | 17            | 5              | 1894 | C         | 1.6.5.3   | K00335 | 1512  | NADH:ubiquinone oxidoreductase, NADH-binding (51 kD) subunit                                                           |
| JGI20225J20221_100115946   | 0               | 5             | 5              | 1529 | C         |           |        | 2738  | Aerobic-type carbon monoxide dehydrogenase, large subunit CoxL/CutL homologs                                           |
| JGI20225J20221_1000014638  | 5               | 10            | 5              | 56   | C         | 3.6.3.14  | K02111 | 6     | F0F1-type ATP synthase, alpha subunit                                                                                  |
| JGI20225J20221_10000041335 | 2               | 7             | 5              | 1155 | C         | 3.6.3.14  | K02117 | 6     | Archaeal/vacuolar-type H+-ATPase subunit A                                                                             |
| JGI20225J20221_100002655   | 0               | 5             | 5              | 2025 | C         |           | K03522 | 1012  | Electron transfer flavoprotein, alpha subunit                                                                          |
| JGI20225J20221_10221481    | 0               | 5             | 5              | 1042 | C         |           | K09181 | 13549 | Acyl-CoA synthetase (NDP forming)                                                                                      |
| JGI20225J20221_100042415   | 0               | 5             | 5              | 1394 | C         | 3.6.3.14  | K02120 | 1813  | Archaeal/vacuolar-type H+-ATPase subunit D                                                                             |
| JGI20225J20221_10000011949 | 0               | 5             | 5              | 39   | C         | 1.1.1.37  | K00024 | 56    | Malate/lactate dehydrogenases                                                                                          |
| JGI20225J20221_1000061151  | 0               | 5             | 5              | 674  | C         | 1.2.7.3   | K00174 | 1855  | Pyruvate:ferredoxin oxidoreductase and related 2-oxoacid:ferredoxin oxidoreductases, alpha subunit                     |

| Locus tag                  | F18 (inactive)* | F19 (active)* | F19-F18 diff.* | COG  | COG alpha | EC        | KO     | Pfam | Best JGI annotation                                                                                                    |
|----------------------------|-----------------|---------------|----------------|------|-----------|-----------|--------|------|------------------------------------------------------------------------------------------------------------------------|
| JGI20225J20221_1000051340  | 0               | 5             | 5              | 55   | C         | 3.6.3.14  | K02112 |      | 6 F0F1-type ATP synthase, beta subunit                                                                                 |
| JGI20225J20221_100035014   | 31              | 36            | 5              | 174  | E         | 6.3.1.2   | K01915 |      | 120 Glutamine synthetase                                                                                               |
| JGI20225J20221_1000001645  | 3               | 8             | 5              | 2008 | E         | 4.1.2.5   | K01620 |      | 1212 Threonine aldolase                                                                                                |
| JGI20225J20221_1000011170  | 0               | 5             | 5              | 1363 | EG        | 3.2.1.4   | K01179 |      | 5343 Cellulase M and related proteins                                                                                  |
| JGI20225J20221_1000026272  | 4               | 9             | 5              | 466  | F         | 6.3.5.3   | K01952 |      | 13507 Phosphoribosylformylglycinamide (FGAM) synthase, synthetase domain                                               |
| JGI20225J20221_1000015522  | 15              | 20            | 5              | 191  | G         | 4.1.2.13  | K01624 |      | 1116 Fructose/tagatose bisphosphate aldolase                                                                           |
| JGI20225J20221_100041045   | 0               | 5             | 5              | 422  | H         |           | K03147 |      | 1964 Thiamine biosynthesis protein ThiC                                                                                |
| JGI20225J20221_1000014870  | 0               | 5             | 5              | 776  | L         |           | K05787 |      | 216 Bacterial nucleoid DNA-binding protein                                                                             |
| JGI20225J20221_1000001170  | 14              | 19            | 5              | 3383 | R         | 1.2.1.2   | K00123 |      | 384 Uncharacterized anaerobic dehydrogenase                                                                            |
| JGI20225J20221_1000001457  | 13              | 17            | 4              | 655  | C         |           | K03809 |      | 3358 Multimeric flavodoxin WrbA                                                                                        |
| JGI20225J20221_100115947   | 2               | 6             | 4              | 1529 | C         |           |        |      | 2738 Aerobic-type carbon monoxide dehydrogenase, large subunit CoxL/CutL homologs                                      |
| JGI20225J20221_100085226   | 6               | 10            | 4              | 1592 | C         |           |        |      | 2915 Rubrethrin                                                                                                        |
| JGI20225J20221_100042414   | 4               | 8             | 4              | 1156 | C         | 3.6.3.14  | K02118 |      | 6 Archaeal/vacuolar-type H+-ATPase subunit B                                                                           |
| JGI20225J20221_10072021    | 0               | 4             | 4              | 1042 | C         |           | K09181 |      | 13607 Acyl-CoA synthetase (NDP forming)                                                                                |
| JGI20225J20221_100057013   | 0               | 4             | 4              | 1249 | C         | 1.8.1.4   | K00382 |      | 7992 Pyruvate/2-oxoglutarate dehydrogenase complex, dihydrolipoamide dehydrogenase (E3) component, and related enzymes |
| JGI20225J20221_100089039   | 1               | 5             | 4              | 5012 | C         |           | K14081 |      | 2310 Predicted cobalamin binding protein - COG5012                                                                     |
| JGI20225J20221_10000041264 | 0               | 4             | 4              | 1941 | C         | 1.12.99.- | K14128 |      | 1058 Coenzyme F420-reducing hydrogenase, gamma subunit                                                                 |
| JGI20225J20221_1000017326  | 0               | 4             | 4              | 1454 | C         | 1.1.1.1   | K04072 |      | 465 Alcohol dehydrogenase, class IV                                                                                    |
| JGI20225J20221_100058762   | 0               | 4             | 4              | 1227 | CP        | 3.6.1.1   | K01507 |      | 2833 Inorganic pyrophosphatase/exopolyphosphatase                                                                      |
| JGI20225J20221_10000011968 | 0               | 4             | 4              | 604  | CR        |           |        |      | 107 NADPH:quinone reductase and related Zn-dependent oxidoreductases                                                   |
| JGI20225J20221_10058163    | 6               | 10            | 4              | 69   | E         |           |        |      | 1645 Glutamate synthase domain 2                                                                                       |
| JGI20225J20221_100036175   | 47              | 51            | 4              | 59   | EH        | 1.1.1.86  | K00053 |      | 7991 Ketol-acid reductoisomerase                                                                                       |
| JGI20225J20221_1000051484  | 2               | 6             | 4              | 1146 | F         | 1.8.99.2  | K00395 |      | 12139 Ferredoxin                                                                                                       |
| JGI20225J20221_10052911    | 6               | 10            | 4              | 57   | G         |           |        |      | 44 Glyceraldehyde-3-phosphate dehydrogenase/erythrose-4-phosphate dehydrogenase                                        |
| JGI20225J20221_1000061295  | 8               | 12            | 4              | 149  | G         | 5.3.1.1   | K01803 |      | 121 Triosephosphate isomerase                                                                                          |
| JGI20225J20221_100771093   | 1               | 5             | 4              | 469  | G         | 2.7.1.40  | K00873 |      | 224 Pyruvate kinase                                                                                                    |
| JGI20225J20221_100035042   | 0               | 4             | 4              | 205  | G         | 2.7.1.11  | K00850 |      | 365 6-phosphofructokinase                                                                                              |
| JGI20225J20221_10000041244 | 0               | 4             | 4              | 4058 | H         | 2.8.4.1   | K00399 |      | 2745 Methyl coenzyme M reductase, alpha subunit                                                                        |
| JGI20225J20221_100047261   | 1               | 5             | 4              | 264  | J         |           | K02357 |      | 889 Translation elongation factor Ts                                                                                   |
| JGI20225J20221_1000038248  | 0               | 4             | 4              | 264  | J         |           | K02357 |      | 889 Translation elongation factor Ts                                                                                   |
| JGI20225J20221_1000001616  | 0               | 4             | 4              | 172  | J         | 6.1.1.11  | K01875 |      | 587 Seryl-tRNA synthetase                                                                                              |
| JGI20225J20221_100138824   | 0               | 4             | 4              | 480  | J         |           | K02355 |      | 9 Translation elongation factors (GTPases)                                                                             |
| JGI20225J20221_1000014404  | 0               | 4             | 4              | 2837 | P         |           | K07223 |      | 4261 Predicted iron-dependent peroxidase - COG2837                                                                     |
| JGI20225J20221_100002979   | 7               | 10            | 3              | 1049 | C         | 4.2.1.3   | K01682 |      | 6434 Aconitase B                                                                                                       |
| JGI20225J20221_1000000472  | 4               | 7             | 3              | 1592 | C         |           |        |      | 2915 Rubrethrin                                                                                                        |
| JGI20225J20221_100050136   | 0               | 3             | 3              | 1740 | C         | 1.12.2.-  | K14070 |      | 1058 Ni,Fe-hydrogenase I small subunit                                                                                 |
| JGI20225J20221_1000018318  | 0               | 3             | 3              | 674  | C         | 1.2.7.-   | K03737 |      | 1855 Pyruvate:ferredoxin oxidoreductase and related 2-oxoacid:ferredoxin oxidoreductases, alpha subunit                |
| JGI20225J20221_1000018772  | 0               | 3             | 3              | 4624 | C         | 1.6.5.3   | K00336 |      | 2906 Iron only hydrogenase large subunit, C-terminal domain                                                            |
| JGI20225J20221_10068971    | 0               | 3             | 3              | 2025 | C         |           | K03522 |      | 1012 Electron transfer flavoprotein, alpha subunit                                                                     |
| JGI20225J20221_100002937   | 3               | 6             | 3              | 2171 | E         | 2.3.1.117 | K00674 |      | 14805 Tetrahydrodipicolinate N-succinyltransferase                                                                     |
| JGI20225J20221_1000017299  | 0               | 3             | 3              | 159  | E         | 4.2.1.20  | K01695 |      | 290 Tryptophan synthase alpha chain                                                                                    |
| JGI20225J20221_1000026357  | 0               | 3             | 3              | 137  | E         | 6.3.4.5   | K01940 |      | 764 Argininosuccinate synthase                                                                                         |
| JGI20225J20221_100036179   | 5               | 8             | 3              | 115  | EH        | 2.6.1.42  | K00826 |      | 1063 Branched-chain amino acid aminotransferase/4-amino-4-deoxychorismate lyase                                        |
| JGI20225J20221_100006145   | 1               | 4             | 3              | 104  | F         | 6.3.4.4   | K01939 |      | 709 Adenylosuccinate synthase                                                                                          |
| JGI20225J20221_1000001313  | 0               | 3             | 3              | 15   | F         | 4.3.2.2   | K01756 |      | 206 Adenylosuccinate lyase                                                                                             |
| JGI20225J20221_1000014531  | 0               | 3             | 3              | 519  | F         | 6.3.5.2   | K01951 |      | 958 GMP synthase, PP-ATPase domain/subunit                                                                             |
| JGI20225J20221_1000165127  | 0               | 3             | 3              | 2759 | F         | 6.3.4.3   | K01938 |      | 1268 Formyltetrahydrofolate synthetase                                                                                 |
| JGI20225J20221_10019235    | 16              | 19            | 3              | 1080 | G         | 2.7.3.9   | K08483 |      | 2896 Phosphoenolpyruvate-protein kinase (PTS system EI component in bacteria)                                          |
| JGI20225J20221_1000045267  | 8               | 11            | 3              | 1080 | G         | 2.7.3.9   | K08483 |      | 2896 Phosphoenolpyruvate-protein kinase (PTS system EI component in bacteria)                                          |
| JGI20225J20221_1000017472  | 1               | 4             | 3              | 469  | G         | 2.7.1.40  | K00873 |      | 224 Pyruvate kinase                                                                                                    |
| JGI20225J20221_1000031379  | 0               | 3             | 3              | 1109 | G         | 5.4.2.2   | K01835 |      | 2878 Phosphomannomutase                                                                                                |
| JGI20225J20221_100006412   | 0               | 3             | 3              | 469  | G         | 2.7.1.40  | K00873 |      | 224 Pyruvate kinase                                                                                                    |
| JGI20225J20221_10000011149 | 6               | 9             | 3              | 54   | H         | 2.5.1.78  | K00794 |      | 885 Riboflavin synthase beta-chain                                                                                     |
| JGI20225J20221_1000004949  | 0               | 3             | 3              | 1812 | H         | 2.5.1.6   | K00789 |      | 1941 Archaeal S-adenosylmethionine synthetase                                                                          |
| JGI20225J20221_10016373    | 1               | 4             | 3              | 214  | H         | 4.-       | K06215 |      | 1680 Pyridoxine biosynthesis enzyme                                                                                    |
| JGI20225J20221_10000011973 | 0               | 3             | 3              | 439  | I         | 6.3.4.14  | K01961 |      | 2786 Biotin carboxylase                                                                                                |
| JGI20225J20221_1000014343  | 0               | 3             | 3              | 304  | IQ        | 2.3.1.41  | K00647 |      | 109 3-oxoacyl-(acyl-carrier-protein) synthase                                                                          |
| JGI20225J20221_100029383   | 0               | 3             | 3              | 1028 | IQR       | 1.1.1.303 | K03366 |      | 106 Dehydrogenases with different specificities (related to short-chain alcohol dehydrogenases)                        |
| JGI20225J20221_1000079362  | 0               | 3             | 3              | 50   | J         |           | K02358 |      | 9 GTPases - translation elongation factors                                                                             |
| JGI20225J20221_1000061329  | 0               | 3             | 3              | 480  | J         |           | K02355 |      | 3764 Translation elongation factors (GTPases)                                                                          |
| JGI20225J20221_10000011928 | 2               | 5             | 3              | 525  | J         | 6.1.1.9   | K01873 |      | 133 Valyl-tRNA synthetase                                                                                              |
| JGI20225J20221_1000243321  | 0               | 3             | 3              | 2092 | J         |           | K03232 |      | 736 Translation elongation factor EF-1beta                                                                             |
| JGI20225J20221_1000001602  | 0               | 3             | 3              | 539  | J         |           | K02945 |      | 575 Ribosomal protein S1                                                                                               |
| JGI20225J20221_1000017358  | 2               | 5             | 3              | 2877 | M         | 2.5.1.55  | K01627 |      | 793 3-deoxy-D-manno-octulosonic acid (KDO) 8-phosphate synthase                                                        |
| JGI20225J20221_100051271   | 0               | 3             | 3              | 459  | O         |           |        |      | 118 Chaperonin GroEL (HSP60 family)                                                                                    |
| JGI20225J20221_1000243313  | 0               | 3             | 3              | 443  | O         |           | K04043 |      | 12 Molecular chaperone                                                                                                 |
| JGI20225J20221_100047876   | 0               | 3             | 3              | 459  | O         |           | K04077 |      | 118 Chaperonin GroEL (HSP60 family)                                                                                    |
| JGI20225J20221_100073661   | 0               | 3             | 3              | 535  | R         |           | K02585 |      | 4055 Predicted Fe-S oxidoreductases - COG0535                                                                          |
| JGI20225J20221_1000185100  | 0               | 3             | 3              |      |           | 2.1.1.90  | K04480 |      | 12176 Methanol-cobalamin methyltransferase B subunit                                                                   |
| JGI20225J20221_100166348   | 0               | 3             | 3              |      |           |           |        |      |                                                                                                                        |
| JGI20225J20221_1000189347  | 8               | 10            | 2              | 1866 | C         | 4.1.1.49  | K01610 |      | 1293 Phosphoenolpyruvate carboxykinase (ATP)                                                                           |
| JGI20225J20221_1000177177  | 6               | 8             | 2              | 1866 | C         | 4.1.1.49  | K01610 |      | 1293 Phosphoenolpyruvate carboxykinase (ATP)                                                                           |
| JGI20225J20221_1000250204  | 9               | 11            | 2              | 3411 | C         |           |        |      | 7845 Ferredoxin                                                                                                        |
| JGI20225J20221_100035425   | 0               | 2             | 2              | 1529 | C         |           |        |      | 2738 Aerobic-type carbon monoxide dehydrogenase, large subunit CoxL/CutL homologs                                      |
| JGI20225J20221_1000638148  | 0               | 2             | 2              | 674  | C         | 1.2.7.-   | K03737 |      | 1855 Pyruvate:ferredoxin oxidoreductase and related 2-oxoacid:ferredoxin oxidoreductases, alpha subunit                |
| JGI20225J20221_100089128   | 8               | 10            | 2              | 4231 | C         | 1.8.99.2  | K00395 |      | 12139 Adenosine-5'-phosphosulfate reductase beta subunit;                                                              |
| JGI20225J20221_100047923   | 5               | 7             | 2              | 1592 | C         |           |        |      | 2915 Rubrethrin                                                                                                        |

| Locus tag                  | F18 (inactive)* | F19 (active)* | F19-F18 diff.* | COG  | COG alpha | EC        | KO     | Pfam  | Best JGI annotation                                                                                                        |
|----------------------------|-----------------|---------------|----------------|------|-----------|-----------|--------|-------|----------------------------------------------------------------------------------------------------------------------------|
| JGI20225J20221_100029387   | 0               | 2             | 2              | 1071 | C         | 1.2.4.1   | K00161 | 676   | Pyruvate/2-oxoglutarate dehydrogenase complex, dehydrogenase (E1) component, eukaryotic type, alpha subunit                |
| JGI20225J20221_100210616   | 0               | 2             | 2              | 280  | C         | 2.3.1.8   | K00625 | 1515  | Phosphotransacetylase                                                                                                      |
| JGI20225J20221_1000001238  | 0               | 2             | 2              | 778  | C         |           |        | 881   | Nitroreductase                                                                                                             |
| JGI20225J20221_100042410   | 0               | 2             | 2              | 1390 | C         | 3.6.3.14  | K02121 | 1991  | Archaea/vacuolar-type H <sup>+</sup> -ATPase subunit E                                                                     |
| JGI20225J20221_10068972    | 0               | 2             | 2              | 2086 | C         |           | K03521 | 1012  | Electron transfer flavoprotein, beta subunit                                                                               |
| JGI20225J20221_1000029366  | 0               | 2             | 2              | 221  | CP        | 3.6.1.1   | K01507 | 719   | Inorganic pyrophosphatase                                                                                                  |
| JGI20225J20221_1000014569  | 8               | 10            | 2              | 112  | E         | 2.1.2.1   | K00600 | 464   | Glycine/serine hydroxymethyltransferase                                                                                    |
| JGI20225J20221_100001496   | 2               | 4             | 2              | 79   | E         | 2.6.1.9   | K00817 | 155   | Histidinol-phosphate/aromatic aminotransferase and cobyrinic acid decarboxylase                                            |
| JGI20225J20221_1000031265  | 0               | 2             | 2              | 1748 | E         | 1.5.1.7   | K00290 | 3435  | Saccharopine dehydrogenase and related proteins                                                                            |
| JGI20225J20221_10003615    | 0               | 2             | 2              | 6    | E         | 3.4.13.9  | K01271 | 557   | Xaa-Pro aminopeptidase                                                                                                     |
| JGI20225J20221_1000306123  | 0               | 2             | 2              | 59   | EH        | 1.1.1.86  | K00053 | 7991  | Ketol-acid reductoisomerase                                                                                                |
| JGI20225J20221_1000034169  | 0               | 2             | 2              | 150  | F         | 6.3.3.1   | K01933 | 2769  | Phosphoribosylaminoimidazole (AIR) synthetase                                                                              |
| JGI20225J20221_1000029409  | 1               | 3             | 2              | 104  | F         | 6.3.4.4   | K01939 | 709   | Adenylosuccinate synthase                                                                                                  |
| JGI20225J20221_1000029206  | 0               | 2             | 2              | 813  | F         | 2.4.2.1   | K03784 | 1048  | Purine-nucleoside phosphorylase                                                                                            |
| JGI20225J20221_1000045144  | 0               | 2             | 2              | 813  | F         | 2.4.2.1   | K03784 | 1048  | Purine-nucleoside phosphorylase                                                                                            |
| JGI20225J20221_1000026392  | 0               | 2             | 2              | 528  | F         | 2.7.4.22  | K09903 | 696   | Uridylate kinase                                                                                                           |
| JGI20225J20221_1000079249  | 1               | 3             | 2              | 448  | G         | 2.7.7.27  | K00975 | 483   | ADP-glucose pyrophosphorylase                                                                                              |
| JGI20225J20221_1000029207  | 0               | 2             | 2              | 1015 | G         | 5.4.2.7   | K01839 | 1676  | Phosphopentomutase                                                                                                         |
| JGI20225J20221_1000001161  | 0               | 2             | 2              | 469  | G         | 2.7.1.40  | K00873 | 224   | Pyruvate kinase                                                                                                            |
| JGI20225J20221_1000061256  | 0               | 2             | 2              | 1105 | G         | 2.7.1.56  | K00882 | 294   | Fructose-1-phosphate kinase and related fructose-6-phosphate kinase (PfkB)                                                 |
| JGI20225J20221_10772375    | 0               | 2             | 2              | 1488 | H         | 2.4.2.11  | K00763 | 4095  | Nicotinic acid phosphoribosyltransferase                                                                                   |
| JGI20225J20221_1000014665  | 0               | 2             | 2              | 561  | HR        |           | K07024 | 8282  | Predicted hydrolases of the HAD superfamily - COG0561                                                                      |
| JGI20225J20221_1000045407  | 2               | 4             | 2              | 264  | J         |           | K02357 | 889   | Translation elongation factor Ts                                                                                           |
| JGI20225J20221_100054713   | 0               | 2             | 2              | 5256 | J         |           | K03231 | 9     | Translation elongation factor EF-1alpha (GTPase)                                                                           |
| JGI20225J20221_100006430   | 0               | 2             | 2              | 143  | J         | 6.1.1.10  | K01874 | 9334  | Methionyl-tRNA synthetase                                                                                                  |
| JGI20225J20221_100002935   | 0               | 2             | 2              | 24   | J         | 3.4.11.18 | K01265 | 557   | Methionine aminopeptidase                                                                                                  |
| JGI20225J20221_10000011440 | 0               | 2             | 2              | 13   | J         | 6.1.1.7   | K01872 | 1411  | Alanyl-tRNA synthetase                                                                                                     |
| JGI20225J20221_1000001902  | 0               | 2             | 2              | 8    | J         | 6.1.1.18  | K01886 | 749   | Glutamyl- and glutaminyl-tRNA synthetases                                                                                  |
| JGI20225J20221_10000011892 | 1               | 3             | 2              | 782  | K         |           | K03624 | 3449  | Transcription elongation factor                                                                                            |
| JGI20225J20221_100111342   | 1               | 3             | 2              | 1846 | K         |           |        | 1047  | Transcriptional regulators                                                                                                 |
| JGI20225J20221_1000004222  | 0               | 2             | 2              | 2101 | K         |           | K03120 | 352   | TATA-box binding protein (TBP), component of TFIID and TFIIB                                                               |
| JGI20225J20221_10000011902 | 0               | 2             | 2              | 766  | M         | 2.5.1.7   | K00790 | 275   | UDP-N-acetylglucosamine enolpyruvyl transferase                                                                            |
| JGI20225J20221_1000001564  | 0               | 2             | 2              | 2885 | M         |           | K03286 | 1389  | Outer membrane protein and related peptidoglycan-associated (lipo)proteins                                                 |
| JGI20225J20221_10001652    | 0               | 2             | 2              | 835  | NT        |           | K03415 | 1584  | Chemotaxis signal transduction protein                                                                                     |
| JGI20225J20221_1000029447  | 5               | 7             | 2              | 234  | O         |           | K04078 | 166   | Co-chaperonin GroES (HSP10)                                                                                                |
| JGI20225J20221_10028576    | 2               | 4             | 2              | 443  | O         |           | K04043 | 12    | Molecular chaperone                                                                                                        |
| JGI20225J20221_1000087633  | 0               | 2             | 2              | 459  | O         |           | K04077 | 118   | Chaperonin GroEL (HSP60 family)                                                                                            |
| JGI20225J20221_1000001622  | 0               | 2             | 2              | 492  | O         | 1.8.1.9   | K00384 | 7992  | Thioredoxin reductase                                                                                                      |
| JGI20225J20221_1000186110  | 0               | 2             | 2              | 1047 | O         | 5.2.1.8   | K03775 | 254   | FKBP-type peptidyl-prolyl cis-trans isomerases 2                                                                           |
| JGI20225J20221_100105335   | 0               | 2             | 2              | 1528 | P         | 1.16.3.1  | K02217 | 210   | Ferritin-like protein                                                                                                      |
| JGI20225J20221_100016876   | 0               | 2             | 2              | 2046 | P         | 2.7.7.4   | K00958 | 1747  | ATP sulfurylase (sulfate adenylyltransferase)                                                                              |
| JGI20225J20221_1000084512  | 0               | 2             | 2              | 1040 | R         |           |        | 12773 |                                                                                                                            |
| JGI20225J20221_1000086417  | 1               | 3             | 2              | 2333 | R         |           |        |       | Predicted am                                                                                                               |
| JGI20225J20221_1000315251  | 0               | 2             | 2              | 589  | T         |           |        |       |                                                                                                                            |
| JGI20225J20221_1000165125  | 0               | 2             | 2              |      |           |           |        |       |                                                                                                                            |
| JGI20225J20221_100008676   | 15              | 16            | 1              | 3411 | C         |           |        | 582   | Universal stress protein UspA and related nucleotide-binding proteins                                                      |
| JGI20225J20221_1000026344  | 15              | 16            | 1              | 1454 | C         |           |        | 7845  | Ferredoxin                                                                                                                 |
| JGI20225J20221_100050177   | 9               | 10            | 1              | 280  | C         | 2.3.1.8   | K00625 | 465   | Alcohol dehydrogenase, class IV                                                                                            |
| JGI20225J20221_100229915   | 0               | 1             | 1              | 56   | C         |           |        | 1515  | Phosphotransacetylase                                                                                                      |
| JGI20225J20221_100017438   | 0               | 1             | 1              | 1148 | C         |           |        | 6     | FOF1-type ATP synthase, alpha subunit                                                                                      |
| JGI20225J20221_100111335   | 0               | 1             | 1              | 2326 | C         |           |        | 13187 |                                                                                                                            |
| JGI20225J20221_1000061152  | 1               | 2             | 1              | 1013 | C         | 1.2.7.3   | K00175 | 3976  | Uncharacterized conserved protein - COG2326                                                                                |
| JGI20225J20221_1000243301  | 0               | 1             | 1              | 644  | C         |           |        | 2775  | Pyruvate:ferredoxin oxidoreductase and related 2-oxoacid:ferredoxin oxidoreductases, beta subunit                          |
| JGI20225J20221_1000017284  | 0               | 1             | 1              | 1048 | C         | 4.2.1.-   | K01681 | 1494  | Dehydrogenases (flavoproteins)                                                                                             |
| JGI20225J20221_100008488   | 0               | 1             | 1              | 1048 | C         | 4.2.1.-   | K01681 | 330   | Aconitase A                                                                                                                |
| JGI20225J20221_100008675   | 0               | 1             | 1              | 1905 | C         | 1.6.5.3   | K00334 | 330   | Aconitase A                                                                                                                |
| JGI20225J20221_10000011473 | 0               | 1             | 1              | 1142 | C         |           | K15827 | 1257  | NADH:ubiquinone oxidoreductase 24 kD subunit                                                                               |
| JGI20225J20221_1000014888  | 0               | 1             | 1              | 527  | E         | 2.7.2.4   | K00928 | 13247 | Fe-S-cluster-containing hydrogenase components 2                                                                           |
| JGI20225J20221_1000011669  | 0               | 1             | 1              | 498  | E         | 4.2.3.1   | K01733 | 696   | Aspartokinases                                                                                                             |
| JGI20225J20221_1000015224  | 0               | 1             | 1              | 119  | E         | 2.3.3.13  | K01649 | 291   | Threonine synthase                                                                                                         |
| JGI20225J20221_10068162    | 0               | 1             | 1              | 65   | E         | 4.2.1.33  | K01703 | 682   | Isopropylmalate/homocitrate/citramalate synthases                                                                          |
| JGI20225J20221_10000012204 | 0               | 1             | 1              | 339  | E         | 3.4.24.70 | K01414 | 330   | 3-isopropylmalate dehydratase large subunit                                                                                |
| JGI20225J20221_1000026377  | 0               | 1             | 1              | 112  | E         | 2.1.2.1   | K00600 | 1432  | Zn-dependent oligopeptidases                                                                                               |
| JGI20225J20221_10001658    | 0               | 1             | 1              | 19   | E         | 4.1.1.20  | K01586 | 464   | Glycine/serine hydroxymethyltransferase                                                                                    |
| JGI20225J20221_100035073   | 0               | 1             | 1              | 548  | E         | 2.7.2.8   | K00930 | 2784  | Diaminopimelate decarboxylase                                                                                              |
| JGI20225J20221_1000026274  | 0               | 1             | 1              | 458  | EF        | 6.3.5.5   | K01955 | 696   | Acetylglutamate kinase                                                                                                     |
| JGI20225J20221_1000029122  | 0               | 1             | 1              | 28   | EH        | 2.2.1.6   | K01652 | 2786  | Carbamoylphosphate synthase large subunit (split gene in MJ)                                                               |
| JGI20225J20221_1000067116  | 0               | 1             | 1              | 329  | EM        | 4.2.1.52  | K01714 | 2776  | Thiamine pyrophosphate-requiring enzymes [acetolactate synthase, pyruvate dehydrogenase (cytochrome), glyoxylate carboliga |
| JGI20225J20221_1000079423  | 2               | 3             | 1              | 493  | ER        | 1.4.1.13  | K00266 | 701   | Dihydrodipicolinate synthase/N-acetylneuraminic lyase                                                                      |
| JGI20225J20221_1000018588  | 0               | 1             | 1              | 493  | ER        | 1.4.1.13  | K00266 | 14691 | NADPH-dependent glutamate synthase beta chain and related oxidoreductases                                                  |
| JGI20225J20221_100247513   | 0               | 1             | 1              | 3185 | ER        | 4.4.1.5   | K01759 | 14691 | NADPH-dependent glutamate synthase beta chain and related oxidoreductases                                                  |
| JGI20225J20221_100054345   | 1               | 2             | 1              | 138  | F         | 2.1.2.3   | K00602 | 13669 |                                                                                                                            |
| JGI20225J20221_1000026170  | 0               | 1             | 1              | 152  | F         | 6.3.2.6   | K01923 | 1808  | AICAR transformylase/IMP cyclohydrolase PurH (only IMP cyclohydrolase domain in AfuI)                                      |
| JGI20225J20221_1000014332  | 0               | 1             | 1              | 34   | F         | 2.4.2.14  | K00764 | 1259  | Phosphoribosylaminoimidazole succinocarboxamide (SAICAR) synthase                                                          |
| JGI20225J20221_100018681   | 0               | 1             | 1              | 47   | F         | 6.3.5.3   | K01952 | 310   | Glutamine phosphoribosylpyrophosphate amidotransferase                                                                     |
| JGI20225J20221_10014822    | 0               | 1             | 1              | 104  | F         | 6.3.4.4   | K01939 | 13507 | Phosphoribosylformylglycinamide (FGAM) synthase, glutamine amidotransferase domain                                         |
| JGI20225J20221_1000038303  | 3               | 4             | 1              | 191  | G         | 4.1.2.13  | K01624 | 709   | Adenylosuccinate synthase                                                                                                  |
|                            |                 |               |                |      |           |           |        | 1116  | Fructose/tagatose bisphosphate aldolase                                                                                    |

| Locus tag                  | F18 (inactive)* | F19 (active)* | F19-F18 diff.* | COG  | COG alpha | EC        | KO     | Pfam | Best JGI annotation                                                                                   |
|----------------------------|-----------------|---------------|----------------|------|-----------|-----------|--------|------|-------------------------------------------------------------------------------------------------------|
| JGI20225J20221_100066629   | 1               | 2             | 1              | 574  | G         | 2.7.9.1   | K01006 |      | 2896 Phosphoenolpyruvate synthase/pyruvate phosphate dikinase                                         |
| JGI20225J20221_1000194134  | 0               | 1             | 1              | 57   | G         | 1.2.1.12  | K00134 |      | 2800 Glyceraldehyde-3-phosphate dehydrogenase/erythrose-4-phosphate dehydrogenase                     |
| JGI20225J20221_1000079279  | 0               | 1             | 1              | 363  | G         | 3.5.99.6  | K02564 |      | 1182 6-phosphogluconolactonase/Glucosamine-6-phosphate isomerase/deaminase                            |
| JGI20225J20221_1000014367  | 0               | 1             | 1              | 837  | G         | 2.7.1.2   | K00845 |      | 2685 Glucokinase                                                                                      |
| JGI20225J20221_1000001284  | 0               | 1             | 1              | 676  | G         | 5.1.3.15  | K01792 |      | 1263 Uncharacterized enzymes related to aldose 1-epimerase                                            |
| JGI20225J20221_1000038317  | 0               | 1             | 1              | 3345 | G         | 3.2.1.22  | K07407 |      | 2065 Alpha-galactosidase                                                                              |
| JGI20225J20221_1000064217  | 0               | 1             | 1              | 4284 | G         | 2.7.7.23  | K00972 |      | 1704 UDP-glucose pyrophosphorylase                                                                    |
| JGI20225J20221_10258832    | 0               | 1             | 1              | 448  | G         | 2.7.7.27  | K00975 |      | 483 ADP-glucose pyrophosphorylase                                                                     |
| JGI20225J20221_10000011430 | 3               | 4             | 1              | 2918 | H         | 6.3.2.2   | K01919 |      | 4262 Gamma-glutamylcysteine synthetase                                                                |
| JGI20225J20221_100042437   | 0               | 1             | 1              | 2138 | H         | 4.99.1.3  | K03795 |      | 1903 Uncharacterized conserved protein                                                                |
| JGI20225J20221_10000041350 | 0               | 1             | 1              | 111  | HR        | 1.1.1.95  | K00058 |      | 2826 Phosphoglycerate dehydrogenase and related dehydrogenases                                        |
| JGI20225J20221_100002650   | 0               | 1             | 1              | 183  | I         | 2.3.1.9   | K00626 |      | 108 Acetyl-CoA acetyltransferase                                                                      |
| JGI20225J20221_100219016   | 0               | 1             | 1              | 236  | IQ        | 6.1.1.13  | K14188 |      | 550 Acyl carrier protein                                                                              |
| JGI20225J20221_10000011010 | 0               | 1             | 1              | 1028 | IQR       | 1.1.1.303 | K03366 |      | 106 Dehydrogenases with different specificities (related to short-chain alcohol dehydrogenases)       |
| JGI20225J20221_10118631    | 0               | 1             | 1              | 480  | J         |           | K02355 |      | 3764 Translation elongation factors (GTPases)                                                         |
| JGI20225J20221_100069279   | 3               | 4             | 1              | 724  | J         |           |        |      | 76 RNA-binding proteins (RRM domain)                                                                  |
| JGI20225J20221_100051636   | 3               | 4             | 1              | 724  | J         |           |        |      | 76 RNA-binding proteins (RRM domain)                                                                  |
| JGI20225J20221_1000540123  | 4               | 5             | 1              | 724  | J         |           |        |      | 76 RNA-binding proteins (RRM domain)                                                                  |
| JGI20225J20221_100148219   | 2               | 3             | 1              | 480  | J         |           | K02355 |      | 3764 Translation elongation factors (GTPases)                                                         |
| JGI20225J20221_1000250153  | 0               | 1             | 1              | 1185 | J         | 2.7.7.8   | K00962 |      | 1138 Polyribonucleotide nucleotidyltransferase (polynucleotide phosphorylase)                         |
| JGI20225J20221_100002931   | 0               | 1             | 1              | 233  | J         |           | K02838 |      | 1765 Ribosome recycling factor                                                                        |
| JGI20225J20221_100031374   | 0               | 1             | 1              | 96   | J         |           | K02994 |      | 410 Ribosomal protein S8                                                                              |
| JGI20225J20221_100033719   | 0               | 1             | 1              | 13   | J         | 6.1.1.7   | K01872 |      | 1411 Alanyl-tRNA synthetase                                                                           |
| JGI20225J20221_10000041375 | 0               | 1             | 1              | 2092 | J         |           | K03232 |      | 736 Translation elongation factor EF-1beta                                                            |
| JGI20225J20221_1000014181  | 0               | 1             | 1              | 143  | J         | 6.1.1.10  | K01874 |      | 9334 Methionyl-tRNA synthetase                                                                        |
| JGI20225J20221_1000026340  | 0               | 1             | 1              | 215  | J         | 6.1.1.16  | K01883 |      | 1406 Cysteinylyl-tRNA synthetase                                                                      |
| JGI20225J20221_1000004386  | 0               | 1             | 1              | 2058 | J         |           | K02869 |      | 428 Ribosomal protein L12E/L44/L45/RPP1/RPP2                                                          |
| JGI20225J20221_1000011689  | 0               | 1             | 1              | 2004 | J         |           | K02974 |      | 1282 Ribosomal protein S24E                                                                           |
| JGI20225J20221_1000045536  | 0               | 1             | 1              | 99   | J         |           |        |      | 416 Ribosomal protein S13                                                                             |
| JGI20225J20221_1000050102  | 0               | 1             | 1              | 50   | J         |           | K02358 |      | 9 GTPases - translation elongation factors                                                            |
| JGI20225J20221_100068361   | 0               | 1             | 1              | 72   | J         | 6.1.1.20  | K01890 |      | 3483 Phenylalanyl-tRNA synthetase beta subunit                                                        |
| JGI20225J20221_10540811    | 0               | 1             | 1              | 480  | J         |           | K02355 |      | 3764 Translation elongation factors (GTPases)                                                         |
| JGI20225J20221_1000015552  | 1               | 2             | 1              | 1846 | K         |           |        |      | 13463                                                                                                 |
| JGI20225J20221_100031387   | 0               | 1             | 1              | 202  | K         | 2.7.7.6   | K03040 |      | 3118 DNA-directed RNA polymerase, alpha subunit/40 kD subunit                                         |
| JGI20225J20221_1000079759  | 0               | 1             | 1              | 217  | KJ        |           |        |      | 1709 Uncharacterized conserved protein - COG0217                                                      |
| JGI20225J20221_1000014643  | 1               | 2             | 1              | 449  | M         | 2.6.1.16  | K00820 |      | 1380 Glucosamine 6-phosphate synthetase, contains amidotransferase and phosphosugar isomerase domains |
| JGI20225J20221_1000004282  | 0               | 1             | 1              | 84   | N         | 3.1.21.-  | K03424 |      | 1026 Mg-dependent DNase                                                                               |
| JGI20225J20221_1000084432  | 7               | 8             | 1              | 443  | O         |           | K04043 |      | 12 Molecular chaperone                                                                                |
| JGI20225J20221_10029619    | 7               | 8             | 1              | 443  | O         |           | K04043 |      | 12 Molecular chaperone                                                                                |
| JGI20225J20221_10000041040 | 0               | 1             | 1              | 443  | O         |           | K04043 |      | 12 Molecular chaperone                                                                                |
| JGI20225J20221_100042718   | 0               | 1             | 1              | 1730 | O         |           | K04797 |      | 2996 Predicted prefoldin, molecular chaperone implicated in de novo protein folding - COG1730         |
| JGI20225J20221_100151118   | 0               | 1             | 1              | 1123 | O         |           | K00400 |      | 5 ATPase components of various ABC-type transport systems, contain duplicated ATPase                  |
| JGI20225J20221_10000012049 | 0               | 1             | 1              | 1047 | O         | 5.2.1.8   | K03775 |      | 254 FKBP-type peptidyl-prolyl cis-trans isomerases 2                                                  |
| JGI20225J20221_1000029145  | 0               | 1             | 1              | 760  | O         | 5.2.1.8   | K03771 |      | 9312 Parvulin-like peptidyl-prolyl isomerase                                                          |
| JGI20225J20221_100002945   | 0               | 1             | 1              | 316  | O         |           | K15724 |      | 1521 Uncharacterized conserved protein - COG0316                                                      |
| JGI20225J20221_1000079657  | 0               | 1             | 1              | 822  | O         |           |        |      | 1592 NifU homolog involved in Fe-S cluster formation                                                  |
| JGI20225J20221_100015641   | 0               | 1             | 1              | 544  | O         |           | K03545 |      | 5697 FKBP-type peptidyl-prolyl cis-trans isomerase (trigger factor)                                   |
| JGI20225J20221_100146625   | 0               | 1             | 1              | 2998 | P         |           | K05772 |      | 12849 ABC-type tungstate transport system, permease component                                         |
| JGI20225J20221_100078020   | 0               | 1             | 1              | 667  | R         |           |        |      | 248 Predicted oxidoreductases (related to aryl-alcohol dehydrogenases) - COG0667                      |
| JGI20225J20221_1000011565  | 0               | 1             | 1              | 535  | R         |           | K02585 |      | 4055 Radical SAM superfamily                                                                          |
| JGI20225J20221_100042426   | 0               | 1             | 1              | 1710 | S         |           |        |      | 8004 Uncharacterized protein conserved in archaea                                                     |
| JGI20225J20221_10086442    | 0               | 1             | 1              |      |           |           |        |      |                                                                                                       |
| JGI20225J20221_10291582    | 0               | 1             | 1              |      |           |           |        |      |                                                                                                       |
| JGI20225J20221_100018699   | 0               | 1             | 1              |      |           |           |        |      |                                                                                                       |
